# Supplementary material for: Ventilatory function as a predictor of mortality in lifelong non-smokers: evidence from large British cohort studies
Source: PubMed Central journal article supplement — BMJ Open. 2017 Jul 12;7(7):e015381. doi: 10.1136/bmjopen-2016-015381 (PMC5734388; doi:10.1136/bmjopen-2016-015381), 2017-07-12
Supplement: bmjopen-2016-015381.draft_revisions.pdf [file bmjopen-2016-015381.draft_revisions.pdf]

# BMJ Open

## Spirometry and survival in large UK cohorts of lifelong non-smokers

|                                 |                                                                                                                                                                                     |
|---------------------------------|-------------------------------------------------------------------------------------------------------------------------------------------------------------------------------------|
| Journal:                        | <i>BMJ Open</i>                                                                                                                                                                     |
| Manuscript ID                   | bmjopen-2016-015381                                                                                                                                                                 |
| Article Type:                   | Research                                                                                                                                                                            |
| Date Submitted by the Author:   | 30-Nov-2016                                                                                                                                                                         |
| Complete List of Authors:       | Gupta, Ramyani; St George's, University of London, Population Health Research Institute<br>Strachan, David; St George's, University of London, Population Health Research Institute |
| <b>Primary Subject Heading</b>: | Epidemiology                                                                                                                                                                        |
| Secondary Subject Heading:      | Respiratory medicine                                                                                                                                                                |
| Keywords:                       | EPIDEMIOLOGY, RESPIRATORY MEDICINE (see Thoracic Medicine), Respiratory physiology < THORACIC MEDICINE                                                                              |
|                                 |                                                                                                                                                                                     |

SCHOLARONE™  
Manuscripts

Peer Review Only

1  
2  
3 **TITLE PAGE**  
4  
5  
6

7 **Title**  
8

9 Spirometry and survival in large UK cohorts of lifelong non-smokers  
10  
11

12  
13  
14 **Authors**  
15

16 Ramyani P Gupta, MSc<sup>1</sup>, David P Strachan, MD<sup>1</sup>  
17  
18

19  
20 **Affiliations**  
21

22 1. Population Health Research Institute, St George's, University of London, UK  
23  
24  
25

26  
27 **Corresponding author**  
28

29 David P Strachan  
30

31 Professor of Epidemiology  
32

33 Population Health Research Institute  
34

35 St George's, University of London  
36

37 Cranmer Terrace  
38

39 London SW17 0RE  
40

41 United Kingdom  
42

43 Tel: +44 (0) 208 735 5429  
44

45 Email: d.strachan@sgul.ac.uk  
46  
47  
48  
49  
50  
51  
52  
53  
54  
55  
56  
57  
58  
59  
60

**Keywords**

Epidemiology; Respiratory medicine; Respiratory physiology

**Word counts**

Abstract: 245 (BMJ Open website)

Text: 2624 (Microsoft Word)

**Author contributions**

The study was conceived by DS. Design and analysis of the Health Survey for England and Scottish Health Surveys modelling was conducted by RG. Design and analysis of the UK Biobank modelling was conducted by DS. Both authors contributed to interpretation of the findings and writing of the manuscript. The corresponding author DS has full access to all the data included in these analyses and is the guarantor of this manuscript.

**Conflict of interests**

There are no conflicts of interest to declare for either RG or DS.

**Data sharing statement**

No additional data are available.

**ABSTRACT**

**Background.** Reduced lung function is an established predictor of all-cause mortality. We sought to verify this among lifelong non-smokers from large UK national surveys.

**Methods.** In UK Biobank, among 149,343 white never-smokers aged 40–69 years at entry, 2401 deaths occurred over a mean 6·5 years follow-up. In the Health Surveys for England (HSE) 1995, 1996, 2001 and Scottish Health Surveys (SHS) 1998 and 2003 combined there were 500 deaths among 6579 white never-smokers aged 40–69 at entry, followed for a mean 14·3 years. Standard deviation (z) scores for forced expiratory volume in the first second (FEV1) and forced vital capacity (FVC) were related to deaths from all causes, circulatory disease and cancers using proportional hazards models adjusted for age, sex, height, socio-economic status, region and survey.

**Results.** In the HSE-SHS dataset, decreasing z-scores for FEV1 and FVC were each associated to a similar degree with increased all-cause mortality (hazard ratios per SD decrement 1·17, 95%CI 1·09–1·25 for zFEV1 and 1·19, 1·10–1·28 for zFVC). This was replicated in Biobank (HRs per SD 1·21, 1·17–1·26 and 1·24, 1·19–1·29, respectively). In HSE-SHS, zFEV1 and zFVC were also associated to similar degrees with mortality from circulatory diseases. These associations were stronger in Biobank. For cancer mortality, the hazard ratios were more consistent between the cohorts. Spirometric indices predicted mortality at least as strongly as systolic blood pressure and body mass index.

**Conclusions.** These results emphasise the importance of promoting lung health in the general population, even among lifelong non-smokers.

## ARTICLE SUMMARY

### Strengths and limitations of this study

- This study is one of the largest studies in the world showing the effect of lung function on mortality in lifelong non-smokers, made possible by the recent availability of data from UK Biobank.
- Results from Biobank are corroborated by findings from health surveys in England and Scotland, which are more representative of the national population and have been followed over a longer period for mortality outcome.
- Both data sources show that better lung function predicts greater survival from a range of causes at least as strongly as systolic blood pressure and body mass index, emphasising the potential importance of promoting lung health in the general population, even in those who have never smoked.
- This analysis was restricted to fatal outcomes but the recent linkage of hospital admissions and primary care consultations to the UK Biobank cohort will allow associations of reduced lung function with incidence and case-fatality to be investigated in future.

### 140 character conclusion from the manuscript for Twitter feed

Lung health is important, even among lifelong non-smokers. Blowing tests predict survival chances as strongly as blood pressure and obesity.

## INTRODUCTION

Four decades of epidemiological research have consistently shown that reduced levels of ventilatory function, measured as one-second forced expiratory volume (FEV1) or forced vital capacity (FVC) are associated with shorter survival in the general population.<sup>1-7</sup> Few studies have reported specifically on lifelong non-smokers,<sup>3,4</sup> a group who form the minority of most populations surveyed hitherto, but are set to become more common in future as smoking becomes less prevalent in higher income countries.

In this report, we compare the relationship of lung function measures (FEV1 and FVC) to subsequent mortality in UK Biobank and in the Health Surveys for England and Scottish Health Surveys. Biobank is the largest spirometric study ever performed in the UK and included a relatively high proportion of never-smokers. The national health surveys, although based on smaller numbers of subjects, recruited a wider age range, have a longer period of follow-up, higher response rates and are more representative of the general UK population than Biobank. The two sources are therefore complementary, in terms of precision and generalisability.

This paper focuses upon findings for white lifelong non-smokers. Corresponding results for white former smokers and current smokers are included in the online supplement for completeness.

## METHODS

### Health Surveys for England and Scottish Health Surveys

Results were combined from the Health Surveys for England 1995, 1996 and 2001,<sup>8-10</sup> and the Scottish Health Surveys 1998 and 2003,<sup>11-12</sup> the years when spirometry was included in the protocol. These surveys aimed to recruit a representative sample of British adults through

1  
2  
3 household sampling within selected parliamentary constituencies throughout England or  
4  
5 Scotland. Participants were visited at home. Response rates ranged from 60% to 76% across  
6  
7 the five surveys. The proportion of those visited who performed usable spirometry ranged  
8  
9 from 63% to 84%.

10  
11 Spirometry was performed using hand-held pneumotachograph spirometers (Vitalograph  
12  
13 Escort) with the best results of FEV1 and FVC recorded from three technically satisfactory  
14  
15 blows. No flow-volume curves or reproducibility criteria were available for assessment.  
16  
17 Valid lung function measurements were available for 6,579 lifelong non-smokers aged 40-69  
18  
19 years and 1,429 aged 70 or more at the start of follow-up.

20  
21 Deaths occurring up to April 2013 were available for analysis in the Health Surveys for  
22  
23 England,<sup>13</sup> and deaths up to December 2011 were linked in the Scottish Health Surveys.<sup>14</sup>  
24  
25 Combining all five surveys, there were 500 deaths among never-smokers aged 40-69 at  
26  
27 recruitment over a mean follow-up period of 14.3 years. Deaths from respiratory disease,  
28  
29 circulatory disease, cancer and all other causes were coded using ICD9 (460-519, 390-459,  
30  
31 140-208, all others, respectively) and ICD10 (chapters J, I, C, all others, respectively).  
32  
33

34  
35 Smoking history was self-reported. Socio-economic status was measured at the level of the  
36  
37 household, based on the social class of the head of the household. Nation (England or  
38  
39 Scotland), region (within England) and survey year were included as additional covariates.  
40  
41  
42  
43  
44  
45  
46  
47

#### 48 **UK Biobank**

49  
50 This study recruited 502,682 volunteers aged 40-69 years in 22 recruitment centres  
51  
52 throughout England, Wales and Scotland during 2006-2010, following invitations to 9  
53  
54 million people.<sup>15</sup> Spirometry was performed using a hand-held pneumotachograph spirometer  
55  
56 (Pneumotrac 6800) from which volume-time arrays were stored for each blow.<sup>16</sup>  
57  
58  
59  
60

1  
2  
3 81% of the cohort performed two blows with acceptable start and measures of FEV1  
4 reproducible within 250mL. This was considered the most inclusive sample of “usable  
5 spiograms”. When end-blow quality was also considered, 58% of the cohort had evidence of  
6 a good plateau and both FEV1 and FVC reproducible within 150mL, the criteria  
7 recommended by the ATS/ERS Task Force on Standardisation of Spirometry.<sup>17</sup> This  
8 subgroup of 58% was considered to be the “best quality” spiograms, among which to  
9 evaluate the relative importance of FEV1 and FVC as predictors of mortality.  
10  
11

12  
13  
14  
15  
16  
17  
18  
19 The present analysis is based on deaths occurring up to mid-August 2015, a mean follow-up  
20 period of 6.5 years. There were 2,401 deaths among 149,343 lifelong non-smokers aged 40-  
21 69 of white ethnicity who performed “usable spiograms”. Deaths from respiratory disease,  
22 circulatory disease, cancer and all other causes were coded using ICD10 (chapters J, I, C, all  
23 others, respectively).  
24  
25  
26  
27  
28  
29

30  
31 Smoking history was self-reported. Socio-economic status was measured at the level of  
32 residential area, using the Townsend deprivation index, grouped into quartiles for analysis.  
33  
34 Biobank recruitment centre was used as an additional covariate to adjust for possible regional  
35 differences.  
36  
37  
38  
39  
40  
41

### 42 **Adjustment of spirometric measures for gender, age and height**

43  
44  
45 The Global Lung Initiative (GLI) 2012 reference equations for white ethnic groups<sup>18</sup> were  
46 used in both sets of data to standardise FEV1 and FVC for age, sex and height. The GLI  
47 equations generate a “z-score” which represents the relative position of an individual among  
48 the distribution predicted for lifelong non-smokers with no history of lung disease of the  
49 same gender, age and height. This allows for the spread of predicted values to differ by age,  
50 height and gender, expressing the relative ranking of an individual in terms of a standard  
51  
52  
53  
54  
55  
56  
57  
58  
59  
60



1  
2  
3 deviation (z) score. For each individual in the analysis, there were three z-scores,  
4  
5 corresponding to their relative ranking for FEV1 (zFEV1), FVC (zFVC) and the ratio  
6  
7 FEV1/FVC (zFEVFVC). Outlying observations were excluded by restricting all the analyses  
8  
9 in both datasets to values of zFEV1 and zFVC within the range -5 to +5 SD units.  
10  
11

### 12 13 14 **Modelling of mortality**

15  
16  
17 The relationship of spirometric indices to subsequent mortality was modelled by proportional  
18  
19 hazards (Cox) regression, which estimates the relative increase in mortality rate (hazard ratio)  
20  
21 for a unit change in each explanatory variable. The z-scores are expressed on a standard  
22  
23 deviation scale, so hazard ratios for zFEV1 and zFVC are expressed per SD decrement (ie. an  
24  
25 increase in risk for a decrease in lung function). A typical range of z-scores among lifelong  
26  
27 non-smokers would be 4SD units. A hazard ratio of 1.2 per SD decrement corresponds  
28  
29 approximately to a twofold difference in mortality rate across the 4SD range.  
30  
31

32  
33  
34 Due to the high correlation between zFEV1 and zFVC, we modelled the effect of zFEV1 both  
35  
36 alone and jointly with zFEVFVC; and similarly for zFVC.  
37  
38

39 All proportional hazards models were restricted to white participants and adjusted for sex,  
40  
41 age, standing height, socio-economic status and region. Analyses of the national health  
42  
43 surveys were additionally adjusted for survey year.  
44  
45  
46  
47  
48  
49  
50  
51  
52  
53  
54  
55  
56  
57  
58  
59  
60

## RESULTS

### All-cause mortality

Table 1 compares the hazard ratios for age-sex-height-adjusted FEV1 and FVC in relation to all-cause mortality in the combined Health Survey for England (HSE) and Scottish Health Surveys (SHS) dataset, and UK Biobank (UKB), among participants aged 40-69 years at entry. All “usable spirograms” from Biobank were included in this comparison, because no additional quality control had been applied in the national health surveys 1995-2003.

**Table 1** All-cause mortality in white lifelong non-smokers aged 40-69 at entry in national health surveys (HSE and SHS) and in UK Biobank

| Timing of death | Cause of death        | HSE-SHS white lifelong non-smokers, 40-69 at entry |                  |                  | Biobank white lifelong non-smokers, 40-69 at entry |                  |                  |
|-----------------|-----------------------|----------------------------------------------------|------------------|------------------|----------------------------------------------------|------------------|------------------|
|                 |                       | Total N (deaths)                                   | zFEV1 HR(95%CI)  | zFVC HR(95%CI)   | Total N (deaths)                                   | zFEV1 HR(95%CI)  | zFVC HR(95%CI)   |
| Any time        | All causes            | 6579 (500)                                         | 1.17 (1.09-1.25) | 1.19 (1.10-1.28) | 149343 (2401)                                      | 1.21 (1.17-1.26) | 1.24 (1.19-1.29) |
| Within 5 years  | All causes            | 6579 (103)                                         | 1.35 (1.17-1.56) | 1.35 (1.16-1.57) | 149343 (1599)                                      | 1.23 (1.17-1.28) | 1.26 (1.20-1.32) |
| After 5 years   | All causes            | 6476 (397)                                         | 1.12 (1.03-1.21) | 1.14 (1.05-1.24) | 147744 (802)                                       | 1.18 (1.11-1.26) | 1.21 (1.13-1.29) |
| Any time        | Respiratory           | 6579 (34)                                          | 1.72 (1.34-2.21) | 1.61 (1.25-2.08) | 149343 (69)                                        | 1.86 (1.53-2.27) | 2.15 (1.77-2.61) |
| Any time        | Circulatory           | 6579 (130)                                         | 1.21 (1.06-1.38) | 1.22 (1.06-1.40) | 149343 (431)                                       | 1.41 (1.30-1.53) | 1.47 (1.35-1.60) |
| Any time        | Cancer                | 6579 (241)                                         | 1.10 (1.00-1.22) | 1.12 (1.01-1.24) | 149343 (1535)                                      | 1.08 (1.03-1.13) | 1.10 (1.05-1.15) |
| Any time        | Other non-respiratory | 6579 (105)                                         | 1.15 (0.98-1.34) | 1.20 (1.03-1.41) | 149343 (366)                                       | 1.46 (1.33-1.59) | 1.45 (1.32-1.59) |

Spirometric indices (FEV1 and FVC) are modelled as z-scores derived from the Global Lung Initiative 2012 reference equations for whites. All hazard ratios are expressed per SD decrement in z-score, adjusted for age, sex, height, socio-economic status, geographical region and survey year.

1  
2  
3  
4  
5  
6 When each spirometric index was modelled singly, all associations were highly statistically  
7  
8 significant ( $p < 0.0001$ ). Among lifelong non-smokers in both cohorts, FEV1 and FVC  
9  
10 displayed similar strengths of association with all-cause mortality. Among current smokers,  
11  
12 however, FEV1 was the stronger predictor in both datasets (Supplementary e-Tables 1 and 2).

13  
14  
15 Table 1 also shows the most direct comparison between the two datasets, based on all-cause  
16  
17 mortality within 5 years. Although the associations of spirometric indices with these earlier  
18  
19 deaths were stronger in HSE-SHS than in UKB, the difference between the cohorts was not  
20  
21 statistically significant. Associations with deaths after 5 years are less comparable between  
22  
23 the datasets, due to the shorter period of follow-up in UKB.  
24  
25

26  
27 Stronger associations of FEV1 and FVC with earlier deaths than with later mortality from all  
28  
29 causes were also evident among former smokers and current smokers, although the  
30  
31 differences were more marked in HSE-SHS than in UKB (e-Tables 1 and 2).  
32  
33

### 34 35 36 37 **Influence of spirogram quality**

38  
39  
40 Table 2 presents the results for all causes of death among Biobank participants with “best  
41  
42 quality” spirograms, for comparison with those obtained from the full set of “usable  
43  
44 spirograms”. The pattern and magnitude of the results among the former subset are very  
45  
46 similar to the overall UKB results.  
47  
48  
49  
50  
51  
52  
53  
54  
55  
56  
57  
58  
59  
60

**Table 2 Comparison of mutually adjusted spirometric indices to predict all-cause mortality in national health surveys (all spirograms) and in UK Biobank (comparing all usable spirograms with best quality spirograms)**

| Subset analysed         | z-score in model (plus covariates) | HSE-SHS white lifelong non-smokers, 40-69 at entry |                  |                  | Biobank white lifelong non-smokers, 40-69 at entry |                  |                  |
|-------------------------|------------------------------------|----------------------------------------------------|------------------|------------------|----------------------------------------------------|------------------|------------------|
|                         |                                    | Total N (deaths)                                   | HR(95%CI) alone  | HR (95%CI) joint | Total N (deaths)                                   | HR(95%CI) alone  | HR (95%CI) joint |
| All usable spirograms   | FEV1 alone                         | 6579 (500)                                         | 1.17 (1.09-1.25) |                  | 149343 (2401)                                      | 1.21 (1.17-1.26) |                  |
|                         | FEV1 adj FEV/FVC                   |                                                    |                  | 1.20 (1.11-1.29) |                                                    |                  | 1.26 (1.21-1.31) |
|                         | FEV/FVC adj FEV1                   |                                                    |                  | 0.94 (0.87-1.01) |                                                    |                  | 0.90 (0.85-0.94) |
| All usable spirograms   | FVC alone                          | 6579 (500)                                         | 1.19 (1.10-1.28) |                  | 149343 (2401)                                      | 1.24 (1.19-1.29) |                  |
|                         | FVC adj FEV/FVC                    |                                                    |                  | 1.19 (1.11-1.28) |                                                    |                  | 1.24 (1.19-1.29) |
|                         | FEV/FVC adj FVC                    |                                                    |                  | 1.02 (0.95-1.10) |                                                    |                  | 1.02 (0.97-1.07) |
| Best quality spirograms | FEV1 alone                         |                                                    | (No data)        |                  | 102945 (1583)                                      | 1.23 (1.18-1.29) |                  |
|                         | FEV1 adj FEV/FVC                   |                                                    |                  | 1.29 (1.23-1.36) |                                                    |                  |                  |
|                         | FEV/FVC adj FEV1                   |                                                    |                  | 0.86 (0.81-0.91) |                                                    |                  |                  |
| Best quality spirograms | FVC alone                          |                                                    | (No data)        |                  | 102945 (1583)                                      | 1.29 (1.23-1.35) |                  |
|                         | FVC adj FEV/FVC                    |                                                    |                  | 1.29 (1.23-1.35) |                                                    |                  |                  |
|                         | FEV/FVC adj FVC                    |                                                    |                  | 0.98 (0.93-1.04) |                                                    |                  |                  |

Spirometric indices (FEV1, FVC and FEV1/FVC ratio) are modelled as z-scores derived from the Global Lung Initiative 2012 reference equations for whites. All hazard ratios are expressed per SD decrement in z-score, adjusted for age, sex, height, socio-economic status, geographical region and survey year.

1  
2  
3  
4  
5  
6 The covariate-adjusted hazard ratios for all-cause mortality comparing the “best quality”  
7 group to the remainder were: 0·94 (95%CI 0·86–1·02) among lifelong non-smokers, HR 1·02  
8 (0·96–1·09) among former smokers and HR 0·94 (0·85–1·04) among current smokers. None  
9 of these hazard ratios are statistically significant, despite very large numbers of subjects  
10 included each comparison.  
11  
12  
13  
14  
15  
16  
17  
18  
19

### 20 **Choice of spirometric index**

21  
22  
23 Among lifelong non-smokers, adding FEV1/FVC ratio to a model including FVC did not  
24 contribute additional information, whereas adding FEV1/FVC ratio to a model including  
25 FEV1 did improve the fit of the model significantly (Table 2). This pattern was evident in  
26 both HSE-SHS and UKB, and among the subset of UKB participants with “best quality”  
27 spirograms.  
28  
29  
30  
31  
32  
33  
34  
35  
36  
37

### 38 **Cause-specific mortality**

39  
40 Table 1 also presents the association of spirometric indices (modelled singly) with  
41 respiratory, circulatory, cancer and other causes of death. The strength of association with  
42 FEV1 and FVC was greatest for respiratory mortality and weakest for cancer deaths. This  
43 applied in both datasets, but the hazard ratios for respiratory, circulatory and other causes of  
44 death were substantially greater in UKB than in HSE-SHS. The results in the two cohorts are  
45 more similar for cancer mortality.  
46  
47  
48  
49  
50  
51  
52  
53

54 Within UKB, results for cause-specific mortality were generally consistent between the  
55 “best” subgroup and the fuller dataset (e-Table 3). FVC emerged as the more influential  
56  
57  
58  
59  
60

1  
2  
3 predictor of non-respiratory mortality and this was confirmed in the subset with good quality  
4 spirometry. The same pattern also applied to respiratory mortality among never-smokers  
5  
6 (Table 1) although these results should be interpreted with caution due to the small number of  
7  
8 respiratory deaths among lifelong non-smokers, particularly among those with good quality  
9  
10 spirograms (e-Table 3).  
11  
12  
13

### 14 15 16 17 **Comparisons by subgroups of age and sex**

18  
19  
20 Supplementary e-Table 2 shows that within UK Biobank there were slightly stronger  
21  
22 associations of mortality with both FEV1 and FVC among male never-smokers, and among  
23  
24 female current smokers, but the general pattern of results was similar in both sexes.  
25  
26

27  
28 Supplementary e-Table 2 also compares the results for all-cause mortality among younger  
29  
30 (aged 40-59) and older (aged 60-69) UKB participants. The hazard ratios in all smoking  
31  
32 groups were consistent between these two age subgroups.  
33  
34

35  
36 Supplementary e-Table 4 compares the spirometric associations with all-cause and cause-  
37  
38 specific mortality among HSE and SHS participants aged 40-69 and 70 or more at entry.  
39  
40 Again, the pattern of results was consistent between these age groups in all smoking  
41  
42 subgroups.  
43  
44  
45  
46

### 47 **Comparisons by prior disease history in UK Biobank**

48  
49  
50 Table 3 compares the spirometric associations with all-cause mortality in Biobank  
51  
52 participants with and without a history of respiratory disease at the baseline spirometric  
53  
54 examination.  
55  
56  
57  
58  
59  
60

1  
2  
3  
4  
5  
6  
7  
8  
9  
10  
11  
12  
13  
14  
15  
16  
17  
18  
19  
20  
21  
22  
23  
24  
25  
26  
27  
28  
29  
30  
31  
32  
33  
34  
35  
36  
37  
38  
39  
40  
41  
42  
43  
44  
45  
46  
47  
48  
49

**Table 3 Comparison of spirometric prediction of mortality among subjects with and without prior disease history at entry in UK Biobank**

| <i>Condition at entry</i> | <i>Cause of death</i> | <i>Biobank age 40-69, white lifelong non-smokers without a history of the condition at entry</i> |                        |                       | <i>Biobank age 40-69, white lifelong non-smokers with a history of the condition at entry</i> |                        |                       |
|---------------------------|-----------------------|--------------------------------------------------------------------------------------------------|------------------------|-----------------------|-----------------------------------------------------------------------------------------------|------------------------|-----------------------|
|                           |                       | <i>Total N (deaths)</i>                                                                          | <i>zFEV1 HR(95%CI)</i> | <i>zFVC HR(95%CI)</i> | <i>Total N (deaths)</i>                                                                       | <i>zFEV1 HR(95%CI)</i> | <i>zFVC HR(95%CI)</i> |
| Respiratory disease       | All causes            | 130798 (2081)                                                                                    | 1.21 (1.16-1.26)       | 1.22 (1.17-1.27)      | 18545 (320)                                                                                   | 1.23 (1.12-1.35)       | 1.33 (1.21-1.47)      |
| Circulatory disease       | Circulatory disease   | 109141 (189)                                                                                     | 1.40 (1.23-1.59)       | 1.40 (1.23-1.60)      | 40202 (242)                                                                                   | 1.35 (1.20-1.51)       | 1.43 (1.27-1.60)      |
| Cancer                    | Cancer                | 137742 (978)                                                                                     | 1.05 (0.99-1.11)       | 1.06 (1.00-1.12)      | 11601 (557)                                                                                   | 1.10 (1.02-1.18)       | 1.13 (1.04-1.22)      |

Spirometric indices (FEV1 and FVC) are modelled as z-scores derived from the Global Lung Initiative 2012 reference equations for whites. All hazard ratios are expressed per SD decrement in z-score, adjusted for age, sex, height, socio-economic status and geographical region (recruitment centre).



1  
2  
3  
4  
5  
6 In the 18,545 (12%) white never-smokers with “usable spirometers” who had a history of  
7 diagnosed respiratory disease (of which 90% reported asthma), FVC was a stronger predictor  
8 of all-cause mortality than FEV1. Among the subgroup without a respiratory history, results  
9 were similar to the full cohort.  
10  
11

12  
13  
14  
15 Lung function also emerged as a significant predictor of circulatory mortality among those  
16 with and without a prior history of heart attack, angina, stroke, thrombosis or hypertension  
17 (Table 3). This pattern was confirmed among former smokers and current smokers (e-Table  
18 5).  
19  
20  
21

22  
23  
24  
25 Finally, the association of FEV1 and FVC with cancer mortality was shown to be stronger in  
26 those with a prior cancer diagnosis (Table 3), though was not statistically significant, despite  
27 the large sample size, among those with no cancer history at the spirometric examination.  
28 However, this finding is confined to the lifelong non-smokers: both FEV1 and FVC were  
29 more strongly and significantly associated with cancer death among former smokers and  
30 current smokers with no cancer history (e-Table 5). Cancer mortality among participants  
31 with a history of cancer at entry was strongly and significantly associated with both FEV1  
32 and FVC in all three smoking subgroups (e-Table 5).  
33  
34  
35  
36  
37  
38  
39  
40  
41  
42  
43  
44  
45

#### 46 **Comparison of spirometry with other predictors of mortality**

47  
48  
49 Figure 1 (data in e-Table 6) compares the relative mortality across quartiles of body mass  
50 index, systolic blood pressure and FVC z-score, for all non-respiratory deaths and for deaths  
51 from circulatory disease, among white lifelong non-smokers in HSE-SHS and in UK  
52 Biobank. A similar pattern emerged in both cohorts, with differentials in mortality across  
53  
54  
55  
56  
57  
58  
59  
60

1  
2  
3 quartiles of zFVC being at least as great as those across quartiles of body mass index or  
4  
5 systolic blood pressure.  
6  
7  
8  
9

## 10 **DISCUSSION**

11  
12  
13 A broadly coherent picture emerges from this comparison of UK national cohorts. Lung  
14 function, even if measured imperfectly, consistently predicts non-respiratory mortality from a  
15 range of causes. This applies even among lifelong non-smokers, so confounding by the  
16 amount or duration of active smoking is not the sole explanation.  
17  
18  
19  
20  
21

22  
23 Previous studies of lifelong non-smokers have been of limited size: 662 males and 2048  
24 females in the Copenhagen City Heart Study,<sup>3</sup> and 3562 male London civil servants in the  
25 Whitehall Study.<sup>4</sup> UK Biobank offers a spirometric study of lifelong non-smokers of  
26 unprecedented size, but its 5.5% participation rate may have compromised its  
27 generalisability. Assembling data from five UK national health surveys produced a cohort  
28 larger than the previous publications<sup>3,4</sup> in which the generalisability of Biobank results could  
29 be tested. The similar pattern of results in HSE-SHS and UKB suggests that the key findings  
30 are generalisable.  
31  
32  
33  
34  
35  
36  
37  
38  
39

40  
41 An analysis of the Atherosclerosis Risk in Communities (ARIC) cohort<sup>7</sup> suggested that FVC  
42 should be considered as a more predictive spirometric index than FEV1. However, this  
43 conclusion was drawn from a cohort of mixed smoking habits. In our study of lifelong non-  
44 smokers, we confirmed that FVC (rather than FEV1) is the index of greater importance in  
45 determining survival in middle-aged never-smokers. However, among current smokers,  
46 FEV1 emerged as the more influential predictor. This may be because the FEV1/FVC ratio  
47 declines with both the dose and duration of smoking, and these also increase mortality risk.  
48  
49  
50  
51  
52  
53  
54  
55  
56  
57  
58  
59  
60

1  
2  
3 The ability to perform good quality spirometry is an integrated assessment of physical and  
4  
5 cognitive function and therefore might be considered a predictor of mortality in its own right.  
6  
7 In the US Six Cities study, excessively variable spirometric performance was an indicator of  
8  
9 poor health and associated with shorter survival.<sup>19</sup> In contrast, the mortality experience of  
10  
11 Biobank participants who produced “best quality” spirograms did not differ greatly from that  
12  
13 of their peers who produced “usable” but not “best quality” blows.  
14  
15

16  
17 In clinical practice, particularly in primary care, quality control of spirometry is unlikely to be  
18  
19 much better than in the national health surveys where lung function was tested by a trained  
20  
21 research nurse in the home setting. Therefore, while the results from the Biobank “best  
22  
23 quality” subgroup are of confirmatory interest, the more inclusive results for all “usable  
24  
25 spirograms” may be more generally relevant.  
26  
27

28  
29 This analysis was restricted to fatal outcomes and therefore cannot distinguish between an  
30  
31 influence of reduced ventilatory function on disease incidence and an effect on case-fatality.  
32  
33 The association with cancer mortality was weaker among those with no cancer diagnosis at  
34  
35 entry, suggesting an effect primarily on case-fatality. In contrast, the association of  
36  
37 spirometric indices with circulatory mortality was equally strong in those with and without a  
38  
39 prior history of circulatory disease. The recent linkage of hospital admissions and primary  
40  
41 care consultations to the UK Biobank cohort will allow associations with incidence and case-  
42  
43 fatality to be investigated more directly in future.  
44  
45

46  
47 In both cohorts, age-sex-height-adjusted lung function emerged as a stronger predictor of  
48  
49 non-respiratory mortality than either systolic blood pressure or body mass index, which are,  
50  
51 respectively, the 2nd and 6th most influential causes worldwide of loss of healthy lifespan, as  
52  
53 measured by disability-adjusted life-years.<sup>20</sup> It is therefore puzzling to find U-shaped or J-  
54  
55 shaped relationships of these two cardiovascular risk factors with non-respiratory mortality,  
56  
57  
58  
59  
60

1  
2  
3 but the similar patterns of results in Biobank and the national health surveys suggests that this  
4  
5 is not a unique feature of either of these British cohorts.  
6  
7

8 Specifically for circulatory disease mortality, FEV1 and FVC were as strongly predictive as  
9  
10 body mass index, and more strongly predictive than systolic blood pressure. Therefore,  
11  
12 spirometry may deserve consideration as an addition to cardiovascular risk scoring  
13  
14 algorithms in future. More generally, however, these results emphasise the potential  
15  
16 importance of promoting and protecting lung health in the general population, even among  
17  
18 lifelong non-smokers with no history of respiratory disease.  
19  
20  
21  
22  
23  
24  
25  
26  
27  
28  
29  
30  
31  
32  
33  
34  
35  
36  
37  
38  
39  
40  
41  
42  
43  
44  
45  
46  
47  
48  
49  
50  
51  
52  
53  
54  
55  
56  
57  
58  
59  
60

## Acknowledgements

This research has been conducted using the UK Biobank Resource and national health surveys data obtained from the UK Data Archive.

## Role of the funding source

This research has been conducted using the UK Biobank Resource and national health surveys data obtained from the UK Data Archive. The analyses presented here were supported by a project grant from the British Lung Foundation (ref: RHotN12-14). Neither UK Biobank nor the UK Data Archive nor the British Lung Foundation have been involved in the writing of the manuscript.

## Ethical approval

This is a secondary analysis of anonymised data from national health surveys, each of which obtained ethics committee approval for their fieldwork,<sup>8-12,15</sup> but no specific ethical approval was required for this data analysis.

## References

- 1 Ashley F, Kannel WB, Sorlie PD, *et al*. Pulmonary function: relation to ageing, cigarette habit and mortality. The Framingham Study. *Ann Intern Med* 1975;**82**:739–45.
- 2 Beaty TH, Cohen BH, Newill CA, *et al*. Impaired pulmonary function as a risk factor for mortality. *Am J Epidemiol* 1982;**116**:102–13.
- 3 Lange P, Nyboe J, Appleyard M, Jensen G, Schnohr P. Spirometric findings and mortality in never smokers. *J Clin Epidemiol* 1990;**43**:867–73.
- 4 Strachan DP. Ventilatory function, height and mortality among lifelong non-smokers. *J Epidemiol Community Health* 1992;**46**:66–70.
- 5 Schunemann HJ, Dorn J, Grant BJB, Winkelstein W, Trevisan M. Pulmonary function is a long-term predictor of mortality in the general population. 29-year follow-up of the Buffalo Health Study. *Chest* 2000;**118**:656–64.
- 6 Mannino DM, Buist AS, Petty TL, Enright PL, Redd SC. Lung function and mortality in the United States: data from the First National Health and Nutrition Examination Survey follow up study. *Thorax* 2003;**58**:388–93.
- 7 Burney PG, Hooper R. Forced vital capacity, airway obstruction and survival in a general population sample from the USA. *Thorax* 2011;**66**:49–54.
- 8 Joint Health Surveys Unit of Social and Community Planning Research and University College London. *Health Survey for England, 1995*. [data collection]. 4th Edition. UK Data Service, 2010 [Accessed 5 October 2016]. Available from: <http://dx.doi.org/10.5255/UKDA-SN-3796-1>

- 1  
2  
3 9 Joint Health Surveys Unit of Social and Community Planning Research and  
4 University College London. *Health Survey for England, 1996*. [data collection]. *4th*  
5  
6  
7 *Edition*. UK Data Service, 2010 [Accessed 5 October 2016]. Available from:  
8  
9 <http://dx.doi.org/10.5255/UKDA-SN-3886-1>  
10  
11  
12 10 National Centre for Social Research, University College London. Department of  
13 Epidemiology and Public Health. *Health Survey for England, 2001*. [data collection].  
14  
15 *3rd Edition*. UK Data Service, 2010 [Accessed 5 October 2016]. Available from:  
16  
17 <http://dx.doi.org/10.5255/UKDA-SN-4628-1>  
18  
19  
20  
21 11 Joint Health Surveys Unit of Social and Community Planning Research and  
22 University College London. *Scottish Health Survey, 1998*. [data collection]. UK Data  
23  
24 Service, 2001 [Accessed 5 October 2016]. Available from:  
25  
26 <http://dx.doi.org/10.5255/UKDA-SN-4379-1>  
27  
28  
29  
30  
31 12 Joint Health Surveys Unit, University College London. *Scottish Health Survey, 2003*.  
32  
33 [data collection]. *2nd Edition*. UK Data Service, 2011 [Accessed 5 October 2016].  
34  
35 Available from: <http://dx.doi.org/10.5255/UKDA-SN-5318-1>  
36  
37  
38  
39 13 Mindell J, Biddulph JP, Hirani V, *et al*. Cohort Profile: The Health Survey for  
40  
41 England. *Int J Epidemiol* 2012;**41**:1585–1593.  
42  
43  
44 14 Gray L, Batty GD, Craig P, *et al*. Cohort Profile: The Scottish Health Surveys Cohort:  
45  
46 linkage of study participants to routinely collected records for mortality, hospital  
47  
48 discharge, cancer and offspring birth characteristics in three nationwide studies. *Int J*  
49  
50 *Epidemiol* 2010;**39**:345–350.  
51  
52  
53 15 Sudlow C, Gallacher J, Allen N, *et al*. UK Biobank: an open access resource for  
54  
55 identifying the causes of a wide range of complex diseases of middle and old age.  
56  
57 *PLoS Med* 2015;**12**:e1001779.  
58  
59  
60

- 1  
2  
3 16 UK Biobank: Protocol for a large-scale prospective epidemiological resource.  
4  
5 Protocol No: UKBB-PROT-09-06 (Main Phase). UK Biobank Coordinating Centre,  
6  
7 2007. Available from: [http://www.ukbiobank.ac.uk/wp-content/uploads/2011/11/UK-](http://www.ukbiobank.ac.uk/wp-content/uploads/2011/11/UK-Biobank-Protocol.pdf)  
8  
9 [Biobank-Protocol.pdf](http://www.ukbiobank.ac.uk/wp-content/uploads/2011/11/UK-Biobank-Protocol.pdf) [Accessed 6 October 2016].  
10  
11  
12 17 Miller MR, Crapo R, Hankinson J, *et al.* ATS/ERS Task Force: Standardisation of  
13 lung function testing. General considerations for lung function testing. *Eur Respir J*  
14 2005;**26**:153–161.  
15  
16  
17 18 Quanjer PH, Stanojevic S, Cole TJ, *et al.* Multi-ethnic reference values for spirometry  
19 for the 3-95-yr age range: the global lung function 2012 equations. *Eur Respir J*  
20 2012;**40**:1324–43.  
21  
22  
23 19 Eisen EA, Dockery DW, Speizer FE, *et al.* The association between health status and  
24 the performance of excessively variable spirometry tests in a population study in six  
25 US cities. *Am Rev Respir Dis* 1987;**136**:1371–76.  
26  
27  
28 20 GBD 2013 Risk Factors Collaborators. Global, regional, and national comparative  
29 risk assessment of 79 behavioural, environmental and occupational, and metabolic  
30 risks or clusters of risks in 188 countries, 1990-2013: a systematic analysis for the  
31 Global Burden of Disease Study 2013. *Lancet* 2015;**386**:2287–323.  
32  
33  
34  
35  
36  
37  
38  
39  
40  
41  
42  
43  
44  
45  
46  
47  
48  
49  
50  
51  
52  
53  
54  
55  
56  
57  
58  
59  
60



**Figure 1 title**

Hazard ratios for death from all non-respiratory causes, and from circulatory diseases, by quartile of age-sex-height-adjusted forced vital capacity (zFVC), systolic blood pressure (SBP) and body mass index (BMI) among white lifelong non-smokers aged 40-69 at entry in national health surveys (HSE and SHS) and in UK Biobank

**Figure 1 footnote**

Hazard ratios are adjusted for age, sex, height, socio-economic status, region and survey year. The reference category (HR=1) is the highest quartile (Q4) for zFVC and the lowest quartile (Q1) for SBP and BMI.

**Figure 1 data**

Included in supplementary e-Table 6

Figure 1

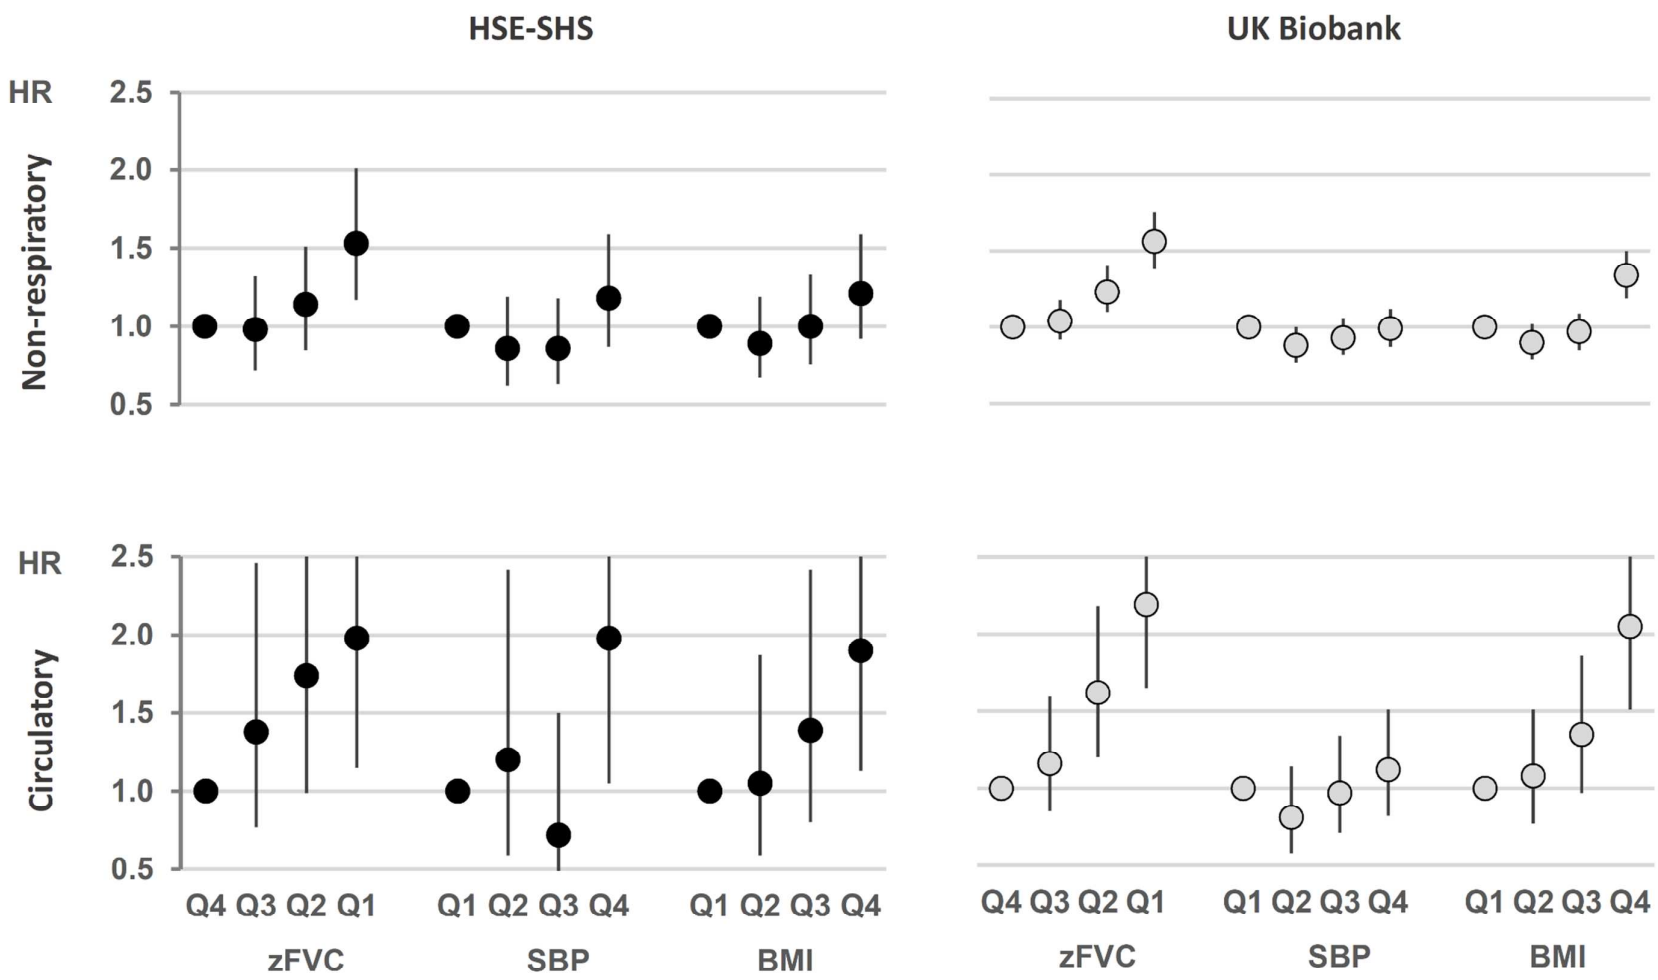

Hazard ratios are adjusted for age, sex, height, socio-economic status, region and survey year.

1  
2  
3  
4  
5 **SUPPLEMENTARY MATERIAL**  
6  
7

8  
9 **Title**

10 Spirometry and survival in large UK cohorts of lifelong non-smokers  
11  
12

13  
14 **Authors**

15  
16 Ramyani P Gupta, MSc<sup>1</sup>, David P Strachan, MD<sup>1</sup>  
17  
18

19  
20 **Affiliations**

21  
22 1. Population Health Research Institute, St George's, University of London, UK  
23  
24

25  
26 **Corresponding author**

27 David P Strachan  
28 Professor of Epidemiology  
29 Population Health Research Institute  
30 St George's, University of London  
31 Cranmer Terrace  
32 London SW17 0RE  
33 United Kingdom  
34 Tel: +44 (0) 208 735 5429  
35 Email: d.strachan@sgul.ac.uk  
36  
37  
38  
39  
40  
41  
42  
43  
44  
45

e-Table 1 Relationship of spirometric indices to mortality before and after 5 years among younger and older subjects, by smoking habit, in the Health Surveys for England and Scottish Health Surveys

| Timing of death       | Smoking history | HSE-SHS age 40-69 at entry, white ethnicity |                  |                  | HSE-SHS age 70+ at entry, white ethnicity |                  |                  |
|-----------------------|-----------------|---------------------------------------------|------------------|------------------|-------------------------------------------|------------------|------------------|
|                       |                 | Total N (deaths)                            | zFEV1 HR (95%CI) | zFVC HR (95%CI)  | Total N (deaths)                          | zFEV1 HR (95%CI) | zFVC HR (95%CI)  |
| All deaths            | Never smokers   | 6579 (500)                                  | 1.17 (1.09-1.25) | 1.19 (1.10-1.28) | 1429 (783)                                | 1.24 (1.17-1.32) | 1.22 (1.15-1.29) |
|                       | Former smokers  | 9403 (1212)                                 | 1.33 (1.28-1.39) | 1.31 (1.25-1.37) | 3083 (1883)                               | 1.23 (1.19-1.28) | 1.20 (1.16-1.25) |
|                       | Current smokers | 6640 (1271)                                 | 1.30 (1.24-1.35) | 1.20 (1.15-1.26) | 909 (666)                                 | 1.36 (1.28-1.46) | 1.23 (1.16-1.31) |
| Deaths within 5 years | Never smokers   | 6579 (103)                                  | 1.35 (1.17-1.56) | 1.35 (1.16-1.57) | 1429 (217)                                | 1.37 (1.23-1.54) | 1.38 (1.24-1.54) |
|                       | Former smokers  | 9403 (288)                                  | 1.43 (1.32-1.55) | 1.49 (1.37-1.63) | 3083 (590)                                | 1.33 (1.25-1.41) | 1.28 (1.20-1.36) |
|                       | Current smokers | 6640 (332)                                  | 1.31 (1.21-1.43) | 1.24 (1.15-1.35) | 909 (250)                                 | 1.33 (1.20-1.48) | 1.19 (1.08-1.32) |
| Deaths after 5 years  | Never smokers   | 6476 (397)                                  | 1.12 (1.03-1.21) | 1.14 (1.05-1.24) | 1212 (566)                                | 1.19 (1.11-1.28) | 1.15 (1.07-1.24) |
|                       | Former smokers  | 9115 (924)                                  | 1.29 (1.23-1.36) | 1.25 (1.19-1.32) | 2493 (1293)                               | 1.19 (1.14-1.24) | 1.17 (1.12-1.22) |
|                       | Current smokers | 6308 (939)                                  | 1.29 (1.23-1.36) | 1.18 (1.12-1.25) | 659 (416)                                 | 1.38 (1.27-1.50) | 1.25 (1.15-1.36) |

Spirometric indices (FEV1, FVC and FEV1/FVC ratio) are modelled as z-scores derived from the Global Lung Initiative 2012 reference equations for whites. All hazard ratios are expressed per SD decrement in z-score, adjusted for age, sex, height, socio-economic status, geographical region and survey year.

e-Table 2 Relationship of spirometric indices to all-cause mortality before and after 5 years, among males and females, and among younger and older subjects, by smoking habit, in UK Biobank

*Biobank age 40-69, white ethnicity, all usable spirograms*

| <i>Subjects and timing of death</i> | <i>Smoking history</i> | <i>Total N (deaths)</i> | <i>zFEV1 HR (95%CI)</i> | <i>zFVC HR (95%CI)</i> |
|-------------------------------------|------------------------|-------------------------|-------------------------|------------------------|
| All subjects, deaths within 5 years | Never smokers          | 149343 (1599)           | 1.23 (1.17-1.28)        | 1.26 (1.20-1.32)       |
|                                     | Former smokers         | 191627 (2998)           | 1.40 (1.36-1.45)        | 1.40 (1.35-1.45)       |
|                                     | Current smokers        | 38514 (1112)            | 1.39 (1.32-1.46)        | 1.29 (1.22-1.36)       |
| All subjects, deaths after 5 years  | Never smokers          | 147744 (802)            | 1.18 (1.11-1.26)        | 1.21 (1.13-1.29)       |
|                                     | Former smokers         | 188629 (1430)           | 1.33 (1.27-1.39)        | 1.32 (1.25-1.38)       |
|                                     | Current smokers        | 37402 (564)             | 1.37 (1.28-1.47)        | 1.30 (1.20-1.40)       |
| Males, all deaths                   | Never smokers          | 56924 (1143)            | 1.24 (1.18-1.31)        | 1.28 (1.21-1.35)       |
|                                     | Former smokers         | 89542 (2714)            | 1.39 (1.34-1.43)        | 1.39 (1.34-1.44)       |
|                                     | Current smokers        | 19909 (1096)            | 1.36 (1.30-1.43)        | 1.27 (1.21-1.34)       |
| Females, all deaths                 | Never smokers          | 92419 (1258)            | 1.18 (1.12-1.24)        | 1.20 (1.14-1.27)       |
|                                     | Former smokers         | 102085 (1714)           | 1.37 (1.31-1.43)        | 1.34 (1.28-1.40)       |
|                                     | Current smokers        | 18605 (580)             | 1.42 (1.33-1.52)        | 1.33 (1.23-1.43)       |
| Age 40-59 at entry, all deaths      | Never smokers          | 90676 (872)             | 1.23 (1.16-1.31)        | 1.25 (1.17-1.33)       |
|                                     | Former smokers         | 101171 (1161)           | 1.36 (1.29-1.43)        | 1.37 (1.30-1.45)       |
|                                     | Current smokers        | 25584 (692)             | 1.39 (1.31-1.48)        | 1.27 (1.19-1.36)       |
| Age 60-69 at entry, all deaths      | Never smokers          | 58667 (1529)            | 1.20 (1.15-1.26)        | 1.23 (1.18-1.29)       |
|                                     | Former smokers         | 90456 (3267)            | 1.39 (1.35-1.43)        | 1.37 (1.33-1.42)       |
|                                     | Current smokers        | 12930 (984)             | 1.38 (1.31-1.45)        | 1.31 (1.24-1.39)       |

Spirometric indices (FEV1 and FVC) are modelled as z-scores derived from the Global Lung Initiative 2012 reference equations for whites.

All hazard ratios are expressed per SD decrement in z-score, adjusted for age, sex, height, socio-economic status and geographical region (recruitment centre).

e-Table 3 Comparison of best quality spirometers with all usable spirometers to predict all-cause and cause-specific mortality, by smoking habit, in UK Biobank

| Cause of death                 | Smoking history | Biobank age 40-69, white ethnicity, best spirometers |                  |                  | Biobank age 40-69, white ethnicity, usable spirometers |                  |                  |
|--------------------------------|-----------------|------------------------------------------------------|------------------|------------------|--------------------------------------------------------|------------------|------------------|
|                                |                 | Total N (deaths)                                     | zFEV1 HR (95%CI) | zFVC HR (95%CI)  | Total N (deaths)                                       | zFEV1 HR (95%CI) | zFVC HR (95%CI)  |
| All causes                     | Never smokers   | 102945 (1583)                                        | 1.23 (1.18-1.29) | 1.29 (1.23-1.35) | 149343 (2401)                                          | 1.21 (1.17-1.26) | 1.24 (1.19-1.29) |
|                                | Former smokers  | 134173 (3043)                                        | 1.39 (1.35-1.44) | 1.40 (1.35-1.45) | 191627 (4428)                                          | 1.38 (1.35-1.42) | 1.37 (1.33-1.41) |
|                                | Current smokers | 26105 (1079)                                         | 1.39 (1.32-1.46) | 1.30 (1.23-1.38) | 38514 (1676)                                           | 1.38 (1.33-1.44) | 1.29 (1.24-1.35) |
| Respiratory diseases           | Never smokers   | 102945 (48)                                          | 2.07 (1.63-2.62) | 2.22 (1.76-2.80) | 149343 (69)                                            | 1.86 (1.53-2.27) | 2.15 (1.77-2.61) |
|                                | Former smokers  | 134173 (140)                                         | 2.52 (2.20-2.88) | 2.28 (1.98-2.63) | 191627 (197)                                           | 2.46 (2.20-2.76) | 2.26 (2.01-2.54) |
|                                | Current smokers | 26105 (66)                                           | 2.93 (2.37-3.62) | 2.44 (1.99-3.00) | 38514 (106)                                            | 2.52 (2.15-2.96) | 2.08 (1.76-2.45) |
| Circulatory diseases           | Never smokers   | 102945 (269)                                         | 1.46 (1.31-1.62) | 1.57 (1.41-1.76) | 149343 (431)                                           | 1.41 (1.30-1.53) | 1.47 (1.35-1.60) |
|                                | Former smokers  | 134173 (590)                                         | 1.56 (1.46-1.68) | 1.66 (1.54-1.79) | 191627 (860)                                           | 1.58 (1.49-1.67) | 1.64 (1.54-1.74) |
|                                | Current smokers | 26105 (219)                                          | 1.43 (1.28-1.60) | 1.45 (1.28-1.63) | 38514 (366)                                            | 1.41 (1.30-1.54) | 1.38 (1.26-1.52) |
| Cancer                         | Never smokers   | 102945 (1023)                                        | 1.10 (1.04-1.16) | 1.13 (1.07-1.20) | 149343 (1535)                                          | 1.08 (1.03-1.13) | 1.10 (1.05-1.15) |
|                                | Former smokers  | 134173 (1907)                                        | 1.27 (1.22-1.32) | 1.25 (1.20-1.31) | 191627 (2762)                                          | 1.25 (1.21-1.30) | 1.23 (1.18-1.27) |
|                                | Current smokers | 26105 (624)                                          | 1.27 (1.19-1.36) | 1.18 (1.09-1.27) | 38514 (937)                                            | 1.28 (1.22-1.36) | 1.20 (1.13-1.27) |
| Other non-respiratory diseases | Never smokers   | 102945 (243)                                         | 1.44 (1.29-1.61) | 1.51 (1.35-1.69) | 149343 (366)                                           | 1.46 (1.33-1.59) | 1.45 (1.32-1.59) |
|                                | Former smokers  | 134173 (406)                                         | 1.43 (1.31-1.56) | 1.49 (1.36-1.63) | 191627 (609)                                           | 1.41 (1.32-1.51) | 1.43 (1.33-1.55) |
|                                | Current smokers | 26105 (170)                                          | 1.36 (1.20-1.55) | 1.25 (1.08-1.44) | 38514 (267)                                            | 1.36 (1.23-1.51) | 1.25 (1.12-1.39) |

Spirometric indices (FEV1 and FVC) are modelled as z-scores derived from the Global Lung Initiative 2012 reference equations for whites. All hazard ratios are expressed per SD decrement in z-score, adjusted for age, sex, height, socio-economic status and geographical region (recruitment centre).

e-Table 4 Relationship of spirometric indices to all-cause and cause-specific mortality among younger and older subjects, by smoking habit, in the Health Surveys for England and Scottish Health Surveys

| Cause of death                 | Smoking history | HSE-SHS age 40-69 at entry, white ethnicity |                  |                  | HSE-SHS age 70+ at entry, white ethnicity |                  |                  |
|--------------------------------|-----------------|---------------------------------------------|------------------|------------------|-------------------------------------------|------------------|------------------|
|                                |                 | Total N (deaths)                            | zFEV1 HR (95%CI) | zFVC HR (95%CI)  | Total N (deaths)                          | zFEV1 HR (95%CI) | zFVC HR (95%CI)  |
| All causes                     | Never smokers   | 6579 (500)                                  | 1.17 (1.09-1.25) | 1.19 (1.10-1.28) | 1429 (783)                                | 1.24 (1.17-1.32) | 1.22 (1.15-1.29) |
|                                | Former smokers  | 9403 (1212)                                 | 1.33 (1.28-1.39) | 1.31 (1.25-1.37) | 3083 (1883)                               | 1.23 (1.19-1.28) | 1.20 (1.16-1.25) |
|                                | Current smokers | 6640 (1271)                                 | 1.30 (1.24-1.35) | 1.20 (1.15-1.26) | 909 (666)                                 | 1.36 (1.28-1.46) | 1.23 (1.16-1.31) |
| Respiratory diseases           | Never smokers   | 6579 (34)                                   | 1.72 (1.34-2.21) | 1.61 (1.25-2.08) | 1429 (118)                                | 1.82 (1.54-2.14) | 1.65 (1.41-1.93) |
|                                | Former smokers  | 9403 (185)                                  | 1.97 (1.77-2.19) | 1.71 (1.53-1.91) | 3083 (347)                                | 1.65 (1.52-1.79) | 1.46 (1.34-1.59) |
|                                | Current smokers | 6640 (355)                                  | 1.70 (1.56-1.84) | 1.40 (1.29-1.52) | 909 (221)                                 | 1.90 (1.69-2.13) | 1.50 (1.34-1.67) |
| Circulatory diseases           | Never smokers   | 6579 (130)                                  | 1.21 (1.06-1.38) | 1.22 (1.06-1.40) | 1429 (299)                                | 1.26 (1.13-1.39) | 1.28 (1.16-1.41) |
|                                | Former smokers  | 9403 (390)                                  | 1.37 (1.28-1.48) | 1.39 (1.28-1.50) | 3083 (745)                                | 1.20 (1.13-1.27) | 1.22 (1.15-1.29) |
|                                | Current smokers | 6640 (380)                                  | 1.26 (1.17-1.36) | 1.22 (1.12-1.32) | 909 (212)                                 | 1.21 (1.08-1.35) | 1.20 (1.07-1.34) |
| Cancer                         | Never smokers   | 6579 (241)                                  | 1.10 (1.00-1.22) | 1.12 (1.01-1.24) | 1429 (166)                                | 1.08 (0.95-1.23) | 1.09 (0.96-1.24) |
|                                | Former smokers  | 9403 (509)                                  | 1.18 (1.10-1.26) | 1.14 (1.06-1.22) | 3083 (448)                                | 1.19 (1.10-1.28) | 1.14 (1.05-1.22) |
|                                | Current smokers | 6640 (532)                                  | 1.21 (1.13-1.29) | 1.09 (1.02-1.17) | 909 (197)                                 | 1.20 (1.07-1.34) | 1.08 (0.96-1.21) |
| Other non-respiratory diseases | Never smokers   | 6579 (105)                                  | 1.15 (0.98-1.34) | 1.20 (1.03-1.41) | 1429 (208)                                | 1.11 (0.98-1.25) | 1.04 (0.92-1.17) |
|                                | Former smokers  | 9403 (204)                                  | 1.22 (1.10-1.35) | 1.32 (1.18-1.48) | 3083 (435)                                | 1.11 (1.03-1.20) | 1.08 (1.00-1.17) |
|                                | Current smokers | 6640 (210)                                  | 1.11 (1.00-1.24) | 1.15 (1.03-1.28) | 909 (117)                                 | 1.20 (1.03-1.40) | 1.11 (0.95-1.29) |

Spirometric indices (FEV1 and FVC) are modelled as z-scores derived from the Global Lung Initiative 2012 reference equations for whites. All hazard ratios are expressed per SD decrement in z-score, adjusted for age, sex, height, socio-economic status, geographical region and survey year.

1  
2  
3  
4  
5  
6  
7  
8  
9  
10  
11  
12  
13  
14  
15  
16  
17  
18  
19  
20  
21  
22  
23  
24  
25  
26  
27  
28  
29  
30  
31  
32  
33  
34  
35  
36  
37  
38  
39  
40  
41  
42  
43  
44  
45  
46  
47  
48  
49

e-Table 5 Spirometric prediction of mortality among subjects with and without a history of selected diseases at entry, by smoking habit, in UK Biobank

| Condition and cause of death                    | Smoking history | Biobank age 40-69, white, no history of condition |                  |                  | Biobank age 40-69, white, with history of condition |                  |                  |
|-------------------------------------------------|-----------------|---------------------------------------------------|------------------|------------------|-----------------------------------------------------|------------------|------------------|
|                                                 |                 | Total N (deaths)                                  | zFEV1 HR (95%CI) | zFVC HR (95%CI)  | Total N (deaths)                                    | zFEV1 HR (95%CI) | zFVC HR (95%CI)  |
| Respiratory disease at entry, all deaths        | Never smokers   | 130798 (2081)                                     | 1.21 (1.16-1.26) | 1.22 (1.17-1.27) | 18545 (320)                                         | 1.23 (1.12-1.35) | 1.33 (1.21-1.47) |
|                                                 | Former smokers  | 166259 (3711)                                     | 1.36 (1.32-1.40) | 1.34 (1.30-1.38) | 25368 (717)                                         | 1.48 (1.39-1.57) | 1.48 (1.39-1.58) |
|                                                 | Current smokers | 33491 (1352)                                      | 1.32 (1.26-1.38) | 1.21 (1.15-1.27) | 5023 (324)                                          | 1.53 (1.39-1.68) | 1.48 (1.35-1.63) |
| Circulatory disease at entry, circulatory death | Never smokers   | 109141 (189)                                      | 1.40 (1.23-1.59) | 1.40 (1.23-1.60) | 40202 (242)                                         | 1.35 (1.20-1.51) | 1.43 (1.27-1.60) |
|                                                 | Former smokers  | 131593 (281)                                      | 1.39 (1.26-1.54) | 1.40 (1.26-1.57) | 60034 (579)                                         | 1.59 (1.48-1.70) | 1.64 (1.52-1.77) |
|                                                 | Current smokers | 27843 (162)                                       | 1.32 (1.16-1.50) | 1.29 (1.12-1.48) | 10671 (204)                                         | 1.42 (1.26-1.59) | 1.36 (1.20-1.54) |
| Cancer at entry, cancer death                   | Never smokers   | 137742 (978)                                      | 1.05 (0.99-1.11) | 1.06 (1.00-1.12) | 11601 (557)                                         | 1.10 (1.02-1.18) | 1.13 (1.04-1.22) |
|                                                 | Former smokers  | 174917 (1898)                                     | 1.21 (1.16-1.26) | 1.18 (1.13-1.23) | 16710 (864)                                         | 1.32 (1.25-1.40) | 1.30 (1.22-1.38) |
|                                                 | Current smokers | 35573 (738)                                       | 1.29 (1.22-1.37) | 1.18 (1.10-1.26) | 2941 (199)                                          | 1.24 (1.11-1.39) | 1.28 (1.12-1.45) |

Spirometric indices (FEV1 and FVC) are modelled as z-scores derived from the Global Lung Initiative 2012 reference equations for whites. All hazard ratios are expressed per SD decrement in z-score, adjusted for age, sex, height, area-based socio-economic measure and geographical region (recruitment centre)..



e-Table 6 Mortality from all non-respiratory causes, and from circulatory diseases, by quartile of systolic blood pressure, body mass index and spirometric indices among white lifelong non-smokers aged 40-69 at entry in national health surveys (HSE and SHS) and in UK Biobank

| Risk factor | Quartile  | Non-respiratory mortality                   |             |                                              |             | Circulatory mortality                       |             |                                             |             |
|-------------|-----------|---------------------------------------------|-------------|----------------------------------------------|-------------|---------------------------------------------|-------------|---------------------------------------------|-------------|
|             |           | HSE-SHS HR (95%CI)<br>(based on 427 deaths) |             | Biobank HR (95%CI)<br>(based on 2256 deaths) |             | HSE-SHS HR (95%CI)<br>(based on 129 deaths) |             | Biobank HR (95%CI)<br>(based on 403 deaths) |             |
| SBP         | Q1 (low)  | 1.00                                        | (reference) | 1.00                                         | (reference) | 1.00                                        | (reference) | 1.00                                        | (reference) |
|             | Q2        | 0.86                                        | (0.62-1.19) | 0.88                                         | (0.77-1.00) | 1.20                                        | (0.59-2.42) | 0.81                                        | (0.58-1.14) |
|             | Q3        | 0.86                                        | (0.63-1.18) | 0.93                                         | (0.82-1.06) | 0.72                                        | (0.34-1.50) | 0.97                                        | (0.71-1.34) |
|             | Q4 (high) | 1.18                                        | (0.87-1.59) | 0.99                                         | (0.87-1.12) | 1.98                                        | (1.05-3.72) | 1.12                                        | (0.82-1.51) |
| BMI         | Q1 (low)  | 1.00                                        | (reference) | 1.00                                         | (reference) | 1.00                                        | (reference) | 1.00                                        | (reference) |
|             | Q2        | 0.89                                        | (0.67-1.19) | 0.90                                         | (0.79-1.02) | 1.05                                        | (0.59-1.87) | 1.08                                        | (0.77-1.51) |
|             | Q3        | 1.00                                        | (0.76-1.33) | 0.97                                         | (0.85-1.09) | 1.39                                        | (0.80-2.42) | 1.35                                        | (0.97-1.86) |
|             | Q4 (high) | 1.21                                        | (0.92-1.59) | 1.34                                         | (1.19-1.50) | 1.90                                        | (1.13-3.22) | 2.05                                        | (1.51-2.79) |
| zFEV1       | Q4 (high) | 1.00                                        | (reference) | 1.00                                         | (reference) | 1.00                                        | (reference) | 1.00                                        | (reference) |
|             | Q3        | 0.98                                        | (0.72-1.32) | 1.10                                         | (0.98-1.25) | 1.73                                        | (0.93-3.22) | 0.97                                        | (0.71-1.33) |
|             | Q2        | 1.20                                        | (0.90-1.59) | 1.13                                         | (1.00-1.27) | 2.13                                        | (1.16-3.89) | 1.29                                        | (0.96-1.73) |
|             | Q1 (low)  | 1.41                                        | (1.07-1.86) | 1.54                                         | (1.37-1.73) | 2.24                                        | (1.25-4.04) | 1.99                                        | (1.52-2.61) |
| zFVC        | Q4 (high) | 1.00                                        | (reference) | 1.00                                         | (reference) | 1.00                                        | (reference) | 1.00                                        | (reference) |
|             | Q3        | 0.98                                        | (0.72-1.32) | 1.04                                         | (0.92-1.18) | 1.38                                        | (0.77-2.46) | 1.16                                        | (0.85-1.60) |
|             | Q2        | 1.14                                        | (0.85-1.51) | 1.23                                         | (1.10-1.40) | 1.74                                        | (0.99-3.04) | 1.62                                        | (1.20-2.18) |
|             | Q1 (low)  | 1.53                                        | (1.17-2.01) | 1.56                                         | (1.38-1.75) | 1.98                                        | (1.15-3.40) | 2.19                                        | (1.65-2.92) |

Spirometric indices (FEV1 and FVC) are modelled as z-scores derived from the Global Lung Initiative 2012 reference equations for whites. All hazard ratios are adjusted for age, sex, height, socio-economic status, geographical region and survey year.

# BMJ Open

## Ventilatory function as a predictor of mortality in lifelong non-smokers: evidence from large British cohort studies

|                                 |                                                                                                                                                                                     |
|---------------------------------|-------------------------------------------------------------------------------------------------------------------------------------------------------------------------------------|
| Journal:                        | <i>BMJ Open</i>                                                                                                                                                                     |
| Manuscript ID                   | bmjopen-2016-015381.R1                                                                                                                                                              |
| Article Type:                   | Research                                                                                                                                                                            |
| Date Submitted by the Author:   | 12-Apr-2017                                                                                                                                                                         |
| Complete List of Authors:       | Gupta, Ramyani; St George's, University of London, Population Health Research Institute<br>Strachan, David; St George's, University of London, Population Health Research Institute |
| <b>Primary Subject Heading</b>: | Epidemiology                                                                                                                                                                        |
| Secondary Subject Heading:      | Respiratory medicine                                                                                                                                                                |
| Keywords:                       | EPIDEMIOLGY, RESPIRATORY MEDICINE (see Thoracic Medicine), Respiratory physiology < THORACIC MEDICINE                                                                               |
|                                 |                                                                                                                                                                                     |

SCHOLARONE™  
Manuscripts

Peer Review Only

1  
2  
3 **bmjopen-2016-015381 resubmission (unmarked copy)**  
4  
5  
6  
7

8 **TITLE PAGE**  
9

10  
11  
12  
13 **Title**

14  
15 Ventilatory function as a predictor of mortality in lifelong non-smokers: evidence from large  
16  
17 British cohort studies  
18  
19

20  
21  
22 **Authors**  
23

24 Ramyani P Gupta, MSc<sup>1</sup>, David P Strachan, MD<sup>1</sup>  
25  
26  
27

28  
29 **Affiliations**  
30

31 1. Population Health Research Institute, St George's, University of London, UK  
32  
33  
34

35  
36 **Corresponding author**  
37

38 David P Strachan  
39

40 Professor of Epidemiology  
41

42 Population Health Research Institute  
43

44 St George's, University of London  
45

46 Cranmer Terrace  
47

48 London SW17 0RE  
49

50 United Kingdom  
51

52 Tel: +44 (0) 208 735 5429  
53

54 Email: d.strachan@sgul.ac.uk  
55  
56  
57  
58  
59  
60

**Keywords**

Epidemiology; Respiratory medicine; Respiratory physiology

**Word counts**

Abstract: 300 (BMJ Open website)

Text: 3885 (Microsoft Word)

**Author contributions**

The study was conceived by DS. Design and analysis of the Health Survey for England and Scottish Health Surveys modelling was conducted by RG. Design and analysis of the UK Biobank modelling was conducted by DS. Both authors contributed to interpretation of the findings and writing of the manuscript. The corresponding author DS has full access to all the data included in these analyses and is the guarantor of this manuscript.

**Conflict of interests**

There are no conflicts of interest to declare for either RG or DS.

**Data sharing statement**

No additional data are available.

**ABSTRACT**

**Background.** Reduced ventilatory function is an established predictor of all-cause mortality in general population cohorts. We sought to verify this in lifelong non-smokers, among whom confounding by active smoking can be excluded, and investigate associations with circulatory and cancer deaths.

**Methods.** In UK Biobank, among 149,343 white never-smokers aged 40–69 years at entry, 2401 deaths occurred over a mean 6.5 years follow-up. In the Health Surveys for England (HSE) 1995, 1996, 2001 and Scottish Health Surveys (SHS) 1998 and 2003 combined there were 500 deaths among 6579 white never-smokers aged 40–69 at entry, followed for a mean 13.9 years. Standard deviation (z) scores for forced expiratory volume in the first second (FEV1) and forced vital capacity (FVC) were derived using Global Lung Initiative 2012 reference equations. These z-scores were related to deaths from all causes, circulatory disease and cancers using proportional hazards models adjusted for age, sex, height, socio-economic status, region and survey.

**Results.** In the HSE-SHS dataset, decreasing z-scores for FEV1 and FVC were each associated to a similar degree with increased all-cause mortality (hazard ratios per unit decrement 1.17, 95%CI 1.09–1.25 for zFEV1 and 1.19, 1.10–1.28 for zFVC). This was replicated in Biobank (HRs 1.21, 1.17–1.26 and 1.24, 1.19–1.29, respectively). zFEV1 and zFVC were less strongly associated with mortality from circulatory diseases in HSE-SHS (HR 1.22, 1.06–1.40 for zFVC) than in Biobank (HR 1.47, 1.35–1.60 for zFVC). For cancer mortality, hazard ratios were more consistent between cohorts (for zFVC: HRs 1.12, 1.01–1.24 in HSE-SHS and 1.10, 1.05–1.15 in Biobank). The strongest associations were with respiratory mortality (for zFVC: HRs 1.61, 1.25–2.08 in HSE-SHS and 2.15, 1.77–2.61 in Biobank).

1  
2  
3 **Conclusions.** Spirometric indices predicted mortality more strongly than systolic blood  
4 pressure or body mass index, emphasising the importance of promoting lung health in the  
5 general population, even among lifelong non-smokers.  
6  
7  
8  
9

## 10 11 12 13 14 15 **ARTICLE SUMMARY**

### 16 17 18 19 *Strengths and limitations of this study*

- 20  
21  
22 • UK Biobank offers a spirometric study of lifelong non-smokers of unprecedented size,  
23 but the low participation rate may have compromised its generalisability.  
24
- 25  
26  
27 • Assembling data from five national health surveys of England or Scotland produced a  
28 cohort of never-smokers, larger than in previously published studies, in which the  
29 generalisability of Biobank results could be tested.  
30  
31
- 32  
33  
34 • Within Biobank, the large numbers permitted subgroup analyses by sex, age, obesity  
35 and pre-existing disease, of sufficient statistical power to exclude important interaction  
36 effects. These within-cohort comparisons provide further reassurance about  
37 generalisability of associations between reduced ventilatory function and mortality.  
38  
39
- 40  
41  
42 • Mortality associations among the subset of Biobank participants whose spirograms met  
43 internationally recommended criteria for acceptability and reproducibility were very  
44 similar to the results among the full Biobank cohort, suggesting that the key findings  
45 are robust to inclusion or exclusion of participants with suboptimal spirometry.  
46  
47
- 48  
49  
50 • In common with previous studies of this issue, this analysis was restricted to fatal  
51 outcomes and therefore cannot distinguish between an association of reduced  
52 ventilatory function with disease incidence and an influence on case-fatality.  
53  
54  
55  
56  
57  
58  
59  
60

## INTRODUCTION

Four decades of epidemiological research have consistently shown that reduced levels of ventilatory function, measured as one-second forced expiratory volume (FEV1) or forced vital capacity (FVC) are associated with higher all-cause mortality rates and therefore shorter survival in the general population.<sup>1-7</sup> Few studies have reported specifically on lifelong non-smokers,<sup>3,4</sup> a group who form the minority of most populations surveyed hitherto, but are set to become more common in future as smoking becomes less prevalent in higher income countries.

Most publications have focused on FEV1, but a recent analysis<sup>7</sup> of asymptomatic participants in the multi-ethnic Atherosclerosis Risk in Communities (ARIC) study reported that all-cause mortality was strongly associated with diminished FVC, after adjustment for FEV1, but not the other way around, and there was no association between survival and the ratio of FEV1 to FVC. This conclusion was based on a combined analysis of smokers and non-smokers.

In this report, we compare the relationship of lung function measures (FEV1 and FVC) to subsequent mortality in UK Biobank and in the Health Surveys for England and Scottish Health Surveys. Biobank is the largest spirometric study ever performed in the UK and included a relatively high proportion of never-smokers. The national health surveys, although based on smaller numbers of subjects, recruited a wider age range, have a longer period of follow-up, higher response rates and are more representative of the general UK population than Biobank. The two sources are therefore complementary, in terms of precision and generalisability.

This paper focuses upon findings for white lifelong non-smokers, among whom confounding by frequency or duration of active smoking can be excluded. We investigate associations of spirometric indices with total mortality and with major groups of causes of death; compare FEV1 and FVC as independent predictors of all-cause mortality, and evaluate the possibility

1  
2  
3 of reverse causation. We also compare results from UK Biobank with those from the national  
4 health survey participants of a similar age at spirometric examination, to establish how widely  
5 generalisable are the findings from Biobank. Corresponding results for white former smokers  
6 and current smokers are included in the online supplement for completeness, and described  
7 briefly in the text.  
8  
9  
10  
11  
12  
13  
14  
15  
16  
17

## 18 **METHODS**

### 19 **Health Surveys for England and Scottish Health Surveys**

20  
21 Data were combined from the Health Surveys for England 1995, 1996 and 2001,<sup>8-10</sup> and the  
22 Scottish Health Surveys 1998 and 2003,<sup>11-12</sup> the years when spirometry was included in the  
23 protocol. These surveys aimed to recruit a representative sample of British adults through  
24 household sampling within selected parliamentary constituencies throughout England or  
25 Scotland. Participants were visited at home. Response rates ranged from 60% to 76% across  
26 the five surveys. The proportion of those visited who performed usable spirometry ranged from  
27 63% to 84%.  
28  
29  
30  
31  
32  
33  
34  
35  
36  
37  
38  
39  
40

41 Spirometry was performed using hand-held pneumotachograph spirometers (Vitalograph  
42 Escort) with the best results of FEV1 and FVC recorded from three technically satisfactory  
43 blows. No flow-volume curves or reproducibility criteria were available for assessment. Valid  
44 lung function measurements were available for 6,579 lifelong non-smokers aged 40-69 years  
45 and 1,429 aged 70 or more at the start of follow-up, all of white ethnicity.  
46  
47  
48  
49  
50  
51  
52

53 Deaths occurring up to April 2013 were available for analysis in the Health Surveys for  
54 England,<sup>13</sup> and deaths up to December 2011 were linked in the Scottish Health Surveys.<sup>14</sup>  
55 Combining all five surveys, there were 500 deaths among white never-smokers aged 40-69 at  
56 recruitment over a mean follow-up period of 13.9 years. Deaths from respiratory disease,  
57  
58  
59  
60



1  
2  
3 circulatory disease, cancer and all other causes were coded using ICD9 (460-519, 390-459,  
4 140-208, all others, respectively) and ICD10 (chapters J, I, C, all others, respectively).  
5  
6  
7

8  
9 Smoking history was self-reported. Socio-economic status was measured at the level of the  
10 household, based on the social class of the head of the household. Nation (England or  
11 Scotland), region (within England) and survey year were included as additional covariates.  
12  
13  
14  
15

### 16 17 18 19 **UK Biobank** 20

21  
22 This study recruited 502,682 volunteers aged 40-69 years in 22 recruitment centres throughout  
23 England, Wales and Scotland during 2006-2010, following invitations to 9 million people.<sup>15</sup>  
24  
25

26 Spirometry was performed using a hand-held pneumotachograph spirometer (Pneumotrac  
27 6800) from which volume-time arrays were stored for each blow.<sup>16</sup>  
28  
29  
30

31  
32 81% of the cohort performed two blows with acceptable start and measures of FEV1  
33 reproducible within 250mL. This was considered the most inclusive sample of “usable  
34 spiograms”. When end-blow quality was also considered, 58% of the cohort had evidence of  
35 a good plateau and both FEV1 and FVC reproducible within 150mL, the criteria recommended  
36 by the ATS/ERS Task Force on Standardisation of Spirometry.<sup>17</sup> This subgroup of 58% was  
37 considered to be the “best quality” spiograms, among which to evaluate the relative  
38 importance of FEV1 and FVC as predictors of mortality.  
39  
40  
41  
42  
43  
44  
45  
46  
47  
48  
49

50 The present analysis is based on deaths occurring up to mid-August 2015, a mean follow-up  
51 period of 6.5 years. There were 2,401 deaths among 149,343 lifelong non-smokers aged 40-69  
52 of white ethnicity who performed “usable spiograms”. Deaths from respiratory disease,  
53 circulatory disease, cancer and all other causes were coded using ICD10 (chapters J, I, C, all  
54 others, respectively).  
55  
56  
57  
58  
59  
60

1  
2  
3 Smoking history was self-reported. Socio-economic status was measured at the level of  
4 residential area, using the Townsend deprivation index, grouped into quartiles for analysis.  
5  
6  
7  
8 Biobank recruitment centre was used as an additional covariate to adjust for possible regional  
9 differences.  
10  
11

### 12 13 14 15 **Adjustment of spirometric measures for gender, age and height**

16  
17  
18 The Global Lung Initiative (GLI) 2012 reference equations for white ethnic groups<sup>18</sup> were used  
19 in both sets of data to standardise FEV1 and FVC for age, sex and height. The GLI-2012  
20 equations generate a “z-score” which represents the relative position of an individual among  
21 the distribution predicted for lifelong non-smokers with no history of lung disease of the same  
22 gender, age and height. This allows for the spread of predicted values to differ by age, height  
23 and gender, expressing the relative ranking of an individual in terms of a standard deviation (z)  
24 score. For each individual in the analysis, there were three GLI-2012 z-scores, corresponding  
25 to their relative ranking for FEV1 (zFEV1), FVC (zFVC) and the ratio FEV1/FVC  
26 (zFEVFVC). Outlying observations were excluded by restricting all the analyses in both  
27 datasets to values of zFEV1 and zFVC within the range -5 to +5 z-score units. This exclusion  
28 removed 0.2% of UK Biobank participants, 0.5% of participants in the national health surveys  
29 aged 40-69 and 0.3% of national health survey participants aged 70 or more.  
30  
31  
32  
33  
34  
35  
36  
37  
38  
39  
40  
41  
42  
43  
44  
45  
46  
47  
48  
49

### 50 **Modelling of mortality**

51  
52 The relationship of spirometric indices to subsequent mortality was modelled by proportional  
53 hazards (Cox) regression, which estimates the relative increase in mortality rate (hazard ratio)  
54 for a unit change in each explanatory variable. The z-scores are expressed on a standard  
55 deviation scale, so hazard ratios for zFEV1 and zFVC are expressed per unit decrement (ie. an  
56  
57  
58  
59  
60

1  
2  
3 increase in risk for a decrease in lung function). A typical range of z-scores among lifelong  
4 non-smokers would be four units. A hazard ratio of 1.2 per unit decrement corresponds  
5 approximately to a twofold difference in mortality rate across this range.  
6  
7  
8  
9

10  
11 Due to the high correlation between zFEV1 and zFVC among lifelong non-smokers (0.88 in  
12 Biobank, 0.80 in national health survey participants aged 40-69), we modelled the association  
13 of mortality with zFEV1 both alone and jointly with zFEV/FVC; and similarly for zFVC.  
14  
15 Among never smokers, the correlations between zFEV1 and zFEV/FVC (0.35 in Biobank, 0.36  
16 in the national surveys) and between zFVC and zFEV/FVC (-0.13 in Biobank, -0.20 in the  
17 national surveys) were weak enough to avoid major collinearity in the joint models. The  
18 significance of the hazard ratio for zFEV/FVC when modelled jointly with zFEV1 was used to  
19 assess whether zFVC predicted mortality independent of zFEV1, and *vice versa* when  
20 zFEV/FVC was modelled jointly with zFVC.  
21  
22  
23  
24  
25  
26  
27  
28  
29  
30  
31  
32

33 All proportional hazards models were restricted to white participants and adjusted for sex, age,  
34 standing height, socio-economic status and region. Analyses of data from the five national  
35 health surveys were additionally adjusted for survey year as a categorical variable. Since each  
36 survey was conducted in a different year, inclusion of survey year in the model is closely  
37 equivalent to a fixed-effect meta-analysis of the results from each of the five surveys. In a more  
38 formal two-stage individual participant meta-analysis for all-cause mortality in lifelong non-  
39 smokers, there was no substantial or significant heterogeneity of hazard ratios among the five  
40 national health surveys ( $I^2 = 0.0\%$ ,  $p = 0.775$  for zFEV1;  $I^2 = 10.5\%$ ,  $p = 0.346$  for zFVC).  
41  
42 Therefore, for simplicity of presentation we report results for the five national surveys  
43 combined, but analyse UK Biobank separately because one of our objectives is to investigate  
44 how closely these two sets of results correspond. Heterogeneity between hazard ratios for the  
45 pooled national surveys and UK Biobank was assessed by testing the significance of the  
46 difference between the corresponding log-hazard-ratios from these two datasets.  
47  
48  
49  
50  
51  
52  
53  
54  
55  
56  
57  
58  
59  
60

1  
2  
3 The assumption of proportionality of hazards was assessed by log-log plots and by fitting  
4 zFEV1 or zFVC as a time-dependent covariate in the model. No strong or statistically  
5 significant evidence of time-dependence emerged for all-cause mortality among lifelong non-  
6 smokers. Nevertheless, results for all-cause mortality were partitioned at 5 years of follow-up  
7 for two reasons. Firstly, because the minimum duration of follow-up in UK Biobank was 4.87  
8 years, so virtually all of that cohort had been followed for 5 years or more, allowing a more  
9 direct comparison with results from the national health surveys, all of which had been followed  
10 for more than 5 years. A second reason for partitioning at 5 years was to address the possibility  
11 of reverse causation (impaired spirometric performance due to pre-existing conditions which  
12 lead to early death). Reverse causation was also investigated by analysing mortality in  
13 subgroups with no prior history of respiratory disease, circulatory disease, or cancer.  
14  
15  
16  
17  
18  
19  
20  
21  
22  
23  
24  
25  
26  
27  
28  
29  
30  
31  
32

## 33 RESULTS

### 34 Participant characteristics

35  
36  
37  
38  
39 Supplementary e-Table 1 summarises the numbers of participants, duration of follow-up and  
40 deaths from all causes and subgroups of cause, in each dataset, by sex, age and smoking history.  
41  
42  
43  
44  
45  
46  
47

### 48 All-cause mortality

49  
50  
51 Table 1 compares the hazard ratios for age-sex-height-adjusted FEV1 and FVC in relation to  
52 all-cause mortality in the combined Health Survey for England (HSE) and Scottish Health  
53 Surveys (SHS) dataset, and UK Biobank (UKB), among participants aged 40-69 years at entry.  
54  
55  
56  
57 All “usable spirograms” from Biobank were included in this comparison, because no additional  
58 quality control had been applied in the national health surveys 1995-2003.  
59  
60

**Table 1 All-cause mortality in white lifelong non-smokers aged 40-69 at entry in national health surveys (HSE and SHS) and in UK Biobank, in relation to GLI-2012 z-scores for FEV1 and FVC**

| Timing of death | Cause of death        | HSE-SHS white lifelong non-smokers, 40-69 at entry |                  |                  | Biobank white lifelong non-smokers, 40-69 at entry |                  |                  |
|-----------------|-----------------------|----------------------------------------------------|------------------|------------------|----------------------------------------------------|------------------|------------------|
|                 |                       | Total N (deaths)                                   | zFEV1 HR(95%CI)  | zFVC HR(95%CI)   | Total N (deaths)                                   | zFEV1 HR(95%CI)  | zFVC HR(95%CI)   |
| Any time        | All causes            | 6579 (500)                                         | 1.17 (1.09-1.25) | 1.19 (1.10-1.28) | 149343 (2401)                                      | 1.21 (1.17-1.26) | 1.24 (1.19-1.29) |
| Within 5 years  | All causes            | 6579 (103)                                         | 1.35 (1.17-1.56) | 1.35 (1.16-1.57) | 149343 (1599)                                      | 1.23 (1.17-1.28) | 1.26 (1.20-1.32) |
| After 5 years   | All causes            | 6476 (397)                                         | 1.12 (1.03-1.21) | 1.14 (1.05-1.24) | 147744 (802)                                       | 1.18 (1.11-1.26) | 1.21 (1.13-1.29) |
| Any time        | Respiratory           | 6579 (34)                                          | 1.72 (1.34-2.21) | 1.61 (1.25-2.08) | 149343 (69)                                        | 1.86 (1.53-2.27) | 2.15 (1.77-2.61) |
| Any time        | Circulatory           | 6579 (130)                                         | 1.21 (1.06-1.38) | 1.22 (1.06-1.40) | 149343 (431)                                       | 1.41 (1.30-1.53) | 1.47 (1.35-1.60) |
| Any time        | Cancer                | 6579 (241)                                         | 1.10 (1.00-1.22) | 1.12 (1.01-1.24) | 149343 (1535)                                      | 1.08 (1.03-1.13) | 1.10 (1.05-1.15) |
| Any time        | Other non-respiratory | 6579 (105)                                         | 1.15 (0.98-1.34) | 1.20 (1.03-1.41) | 149343 (366)                                       | 1.46 (1.33-1.59) | 1.45 (1.32-1.59) |

Spirometric indices (FEV1 and FVC) are modelled as z-scores derived from the Global Lung Initiative 2012 reference equations for whites. All hazard ratios are expressed per unit decrement in z-score, adjusted for age, sex, height, socio-economic status, geographical region and survey year.

1  
2  
3  
4  
5  
6  
7  
8  
9  
10  
11  
12  
13  
14  
15  
16  
17  
18  
19  
20  
21  
22  
23  
24  
25  
26  
27  
28  
29  
30  
31  
32  
33  
34  
35  
36  
37  
38  
39  
40  
41  
42  
43  
44  
45  
46  
47  
48  
49  
50  
51  
52  
53  
54  
55  
56  
57  
58  
59  
60

When each spirometric index was modelled singly, all associations were highly statistically significant ( $p < 0.0001$ ). Among lifelong non-smokers in both cohorts, FEV1 and FVC displayed similar strengths of association with all-cause mortality (Table 1). Among former smokers, FEV1 was the stronger predictor in HSE-SHS but FEV1 and FVC showed similar strength of association with all-cause mortality in UKB. Among current smokers in both datasets, FEV1 was a stronger predictor of all-cause mortality than FVC (e-Tables 2-4).

Table 1 also shows the most direct comparison between the two datasets, based on all-cause mortality within 5 years. Although the associations of spirometric indices with these earlier deaths were stronger in HSE-SHS than in UKB, the differences between the cohorts were not statistically significant ( $p = 0.23$  for FEV1,  $p = 0.39$  for FVC). Associations with deaths after 5 years are less comparable between the datasets, due to the shorter period of follow-up in UKB.

Stronger associations of FEV1 and FVC with earlier deaths than with later mortality from all causes were also evident among former smokers and current smokers, although the differences were more marked in HSE-SHS than in UKB (e-Tables 2 and 3). Formal tests for time-dependence of the hazard ratio (HR) for all-cause mortality found statistically significant reduction in HR with increasing follow-up time (t) only among ex-smokers ( $p = 0.00032$  for  $zFEV1 * t$  in UKB,  $p = 0.021$  for  $zFEV1 * t$  in HSE-SHS,  $p = 0.000006$  for  $zFVC * t$  in UKB,  $p = 0.001$  for  $zFVC * t$  in HSE-SHS). Among never-smokers and current smokers in both datasets, the reduction in HR with increasing follow-up was small (a relative reduction of 1% per year) and non-significant ( $p > 0.05$ ) for both FEV1 and FVC.

These analyses confirm that the modelling assumption of proportionality of hazards over the duration of follow-up is valid, at least for lifelong non-smokers, in both datasets.

1  
2  
3  
4  
5  
6  
7  
8  
9  
10  
11  
12  
13  
14  
15  
16  
17  
18  
19  
20  
21  
22  
23  
24  
25  
26  
27  
28  
29  
30  
31  
32  
33  
34  
35  
36  
37  
38  
39  
40  
41  
42  
43  
44  
45  
46  
47

**Table 2 Comparison of mutually adjusted spirometric indices to predict all-cause mortality in national health surveys (all spirograms) and in UK Biobank (comparing all usable spirograms with best quality spirograms)**

| <i>Subset analysed</i>  | <i>z-score in model (plus covariates)</i> | <i>HSE-SHS white lifelong non-smokers, 40-69 at entry</i> |                        |                         | <i>Biobank white lifelong non-smokers, 40-69 at entry</i> |                        |                         |
|-------------------------|-------------------------------------------|-----------------------------------------------------------|------------------------|-------------------------|-----------------------------------------------------------|------------------------|-------------------------|
|                         |                                           | <i>Total N (deaths)</i>                                   | <i>HR(95%CI) alone</i> | <i>HR (95%CI) joint</i> | <i>Total N (deaths)</i>                                   | <i>HR(95%CI) alone</i> | <i>HR (95%CI) joint</i> |
| All usable spirograms   | FEV1 alone                                | 6579 (500)                                                | 1.17 (1.09-1.25)       |                         | 149343 (2401)                                             | 1.21 (1.17-1.26)       |                         |
|                         | FEV1 adj FEV/FVC                          |                                                           |                        | 1.20 (1.11-1.29)        |                                                           |                        | 1.26 (1.21-1.31)        |
|                         | FEV/FVC adj FEV1                          |                                                           |                        | 0.94 (0.87-1.01)        |                                                           |                        | 0.90 (0.85-0.94)        |
| All usable spirograms   | FVC alone                                 | 6579 (500)                                                | 1.19 (1.10-1.28)       |                         | 149343 (2401)                                             | 1.24 (1.19-1.29)       |                         |
|                         | FVC adj FEV/FVC                           |                                                           |                        | 1.19 (1.11-1.28)        |                                                           |                        | 1.24 (1.19-1.29)        |
|                         | FEV/FVC adj FVC                           |                                                           |                        | 1.02 (0.95-1.10)        |                                                           |                        | 1.02 (0.97-1.07)        |
| Best quality spirograms | FEV1 alone                                |                                                           | (No data)              |                         | 102945 (1583)                                             | 1.23 (1.18-1.29)       |                         |
|                         | FEV1 adj FEV/FVC                          |                                                           |                        | 1.29 (1.23-1.36)        |                                                           |                        |                         |
|                         | FEV/FVC adj FEV1                          |                                                           |                        | 0.86 (0.81-0.91)        |                                                           |                        |                         |
| Best quality spirograms | FVC alone                                 |                                                           | (No data)              |                         | 102945 (1583)                                             | 1.29 (1.23-1.35)       |                         |
|                         | FVC adj FEV/FVC                           |                                                           |                        | 1.29 (1.23-1.35)        |                                                           |                        |                         |
|                         | FEV/FVC adj FVC                           |                                                           |                        | 0.98 (0.93-1.04)        |                                                           |                        |                         |

Spirometric indices (FEV1, FVC and FEV1/FVC ratio) are modelled as z-scores derived from the Global Lung Initiative 2012 reference equations for whites. All hazard ratios are expressed per unit decrement in z-score, adjusted for age, sex, height, socio-economic status, geographical region and survey year.

### **Influence of spirogram quality**

Table 2 presents the results for all causes of death among Biobank participants with “best quality” spirometry, for comparison with those obtained from the full set of “usable spirometry”. The pattern and magnitude of the results among the former subset are very similar to the overall UKB results.

The covariate-adjusted hazard ratios for all-cause mortality comparing the “best quality” group to the remainder were: 0.94 (95% CI 0.86–1.02) among lifelong non-smokers, HR 1.02 (0.96–1.09) among former smokers and HR 0.94 (0.85–1.04) among current smokers. None of these hazard ratios are statistically significant, despite very large numbers of subjects included each comparison.

### **Choice of spirometric index**

Among lifelong non-smokers, adding FEV1/FVC ratio to a model including FVC did not contribute additional information, whereas adding FEV1/FVC ratio to a model including FEV1 did improve the fit of the model significantly (Table 2). This pattern was evident in both HSE-SHS and UKB, and among the subset of UKB participants with “best quality” spirometry.

### **Cause-specific mortality**

Table 1 also presents the association of spirometric indices (modelled singly) with respiratory, circulatory, cancer and other causes of death among lifelong non-smokers. The strength of association with FEV1 and FVC was greatest for respiratory mortality and weakest for cancer deaths. This applied in both datasets, but the hazard ratios for respiratory, circulatory and other causes of death were greater in UKB than in HSE-SHS. The results in the two cohorts are more



1  
2  
3 similar for cancer mortality. The heterogeneity of hazard ratios between the two datasets was  
4 statistically significant only for FVC in relation to circulatory mortality ( $p = 0.025$ ), and for  
5  
6 both FEV1 ( $p = 0.009$ ) and FVC ( $p = 0.042$ ) in relation to causes of death other than respiratory,  
7  
8 circulatory or cancer among never-smokers. Within UKB, results for cause-specific mortality  
9  
10 were generally consistent between the “best spirogram” subgroup and the fuller dataset, in all  
11  
12 smoking subgroups (e-Table 4).  
13  
14  
15  
16  
17  
18  
19  
20

### 21 **Comparisons by subgroups of age and sex**

22  
23  
24 Supplementary e-Table 3 shows that within UK Biobank the general pattern of results was  
25  
26 similar in both sexes. There was no statistically significant effect modification by sex for either  
27  
28 spirometric index in any smoking subgroup ( $p \geq 0.10$  for each interaction test).  
29  
30

31  
32 Supplementary e-Table 3 also compares the results for all-cause mortality among younger  
33  
34 (aged 40-59) and older (aged 60-69) UKB participants. The hazard ratios in all smoking groups  
35  
36 were consistent between these two age subgroups and there were no statistically significant age  
37  
38 interactions for either spirometric index ( $p > 0.40$ ).  
39  
40

41  
42 Supplementary e-Table 5 compares the spirometric associations with all-cause and cause-  
43  
44 specific mortality among HSE and SHS participants aged 40-69 and 70 or more at entry. The  
45  
46 pattern for all-causes was consistent between these age groups in never-smokers and current  
47  
48 smokers ( $p > 0.2$ ), but there were significant age interactions among ex-smokers ( $p < 0.006$ ).  
49  
50

51  
52 Supplementary e-Table 3 compares the results for all-cause mortality among obese and non-  
53  
54 obese Biobank participants. Although the pattern of results was generally consistent between  
55  
56 these categories in all smoking subgroups, a statistically significant difference in the hazard  
57  
58 ratio for FVC occurred among current smokers ( $p=0.022$ ). Other interactions with obesity were  
59  
60 non-significant ( $p \geq 0.10$ ).

**Table 3** Comparison of spirometric prediction of mortality among subjects with and without prior disease history at entry in UK Biobank

| <i>Condition at entry</i> | <i>Cause of death</i> | <i>Biobank age 40-69, white lifelong non-smokers without a history of the condition at entry</i> |                        |                       | <i>Biobank age 40-69, white lifelong non-smokers with a history of the condition at entry</i> |                        |                       |
|---------------------------|-----------------------|--------------------------------------------------------------------------------------------------|------------------------|-----------------------|-----------------------------------------------------------------------------------------------|------------------------|-----------------------|
|                           |                       | <i>Total N (deaths)</i>                                                                          | <i>zFEV1 HR(95%CI)</i> | <i>zFVC HR(95%CI)</i> | <i>Total N (deaths)</i>                                                                       | <i>zFEV1 HR(95%CI)</i> | <i>zFVC HR(95%CI)</i> |
| Respiratory disease       | All causes            | 130798 (2081)                                                                                    | 1.21 (1.16-1.26)       | 1.22 (1.17-1.27)      | 18545 (320)                                                                                   | 1.23 (1.12-1.35)       | 1.33 (1.21-1.47)      |
| Circulatory disease       | Circulatory disease   | 109141 (189)                                                                                     | 1.40 (1.23-1.59)       | 1.40 (1.23-1.60)      | 40202 (242)                                                                                   | 1.35 (1.20-1.51)       | 1.43 (1.27-1.60)      |
| Cancer                    | Cancer                | 137742 (978)                                                                                     | 1.05 (0.99-1.11)       | 1.06 (1.00-1.12)      | 11601 (557)                                                                                   | 1.10 (1.02-1.18)       | 1.13 (1.04-1.22)      |

Spirometric indices (FEV1 and FVC) are modelled as z-scores derived from the Global Lung Initiative 2012 reference equations for whites.

All hazard ratios are expressed per unit decrement in z-score, adjusted for age, sex, height, socio-economic status and geographical region (recruitment centre).

### Comparisons by prior disease history in UK Biobank

Table 3 compares the spirometric associations with all-cause mortality in Biobank participants with and without a history of respiratory disease at the baseline spirometric examination. In the 18,545 (12%) white never-smokers with “usable spirograms” who had a history of diagnosed respiratory disease (of which 90% reported asthma), FVC was a stronger predictor of all-cause mortality than FEV1. Among the subgroup without a respiratory history, results were similar to the full cohort.

Lung function also emerged as a significant predictor of circulatory mortality among those with and without a prior history of heart attack, angina, stroke, thrombosis or hypertension (Table 3). This pattern was confirmed among former smokers and current smokers (e-Table 6).

Finally, the association of FEV1 and FVC with cancer mortality was shown to be stronger in those with a prior cancer diagnosis (Table 3), but it was not statistically significant, despite the large sample size, among those with no cancer history at the spirometric examination. However, this finding is confined to the lifelong non-smokers: both FEV1 and FVC were more strongly and significantly associated with cancer death among former smokers and current smokers with no cancer history (e-Table 6). Cancer mortality among participants with a history of cancer at entry was strongly and significantly associated with both FEV1 and FVC in all three smoking subgroups (e-Table 6).

### Comparison of spirometry with other predictors of mortality

Figure 1 (data in e-Table 7) compares the relative mortality across quartiles of body mass index, systolic blood pressure and FVC z-score, for all deaths and for deaths from circulatory disease, among white lifelong non-smokers in HSE-SHS and in UK Biobank. A similar pattern emerged

1  
2  
3 for all-cause mortality in both cohorts, with differentials in mortality across quartiles of zFVC  
4 being at least as great as those across quartiles of body mass index or systolic blood pressure.  
5  
6  
7  
8  
9

## 10 **DISCUSSION**

### 11 **Principal findings**

12  
13  
14 A broadly coherent picture emerges from this comparison of UK national cohorts. Ventilatory  
15 function, even if measured imperfectly, consistently predicted both respiratory deaths and non-  
16 respiratory mortality from a range of causes. This was found even among lifelong non-smokers,  
17 so confounding by the amount or duration of active smoking is not the sole explanation. Both  
18 for all-cause mortality, and more specifically for circulatory disease mortality, FEV1 and FVC  
19 were as strongly predictive as body mass index, and more strongly predictive than systolic  
20 blood pressure.  
21  
22  
23  
24  
25  
26  
27  
28  
29  
30  
31  
32  
33  
34  
35  
36  
37

### 38 **Strengths and weaknesses of this study**

39  
40 UK Biobank offers a spirometric study of lifelong non-smokers of unprecedented size, but its  
41 5.5% participation rate may have compromised its generalisability. Assembling data from five  
42 UK national health surveys produced a cohort of never-smokers, larger than the combined  
43 number of participants in previous publications<sup>3,4</sup> in which the generalisability of Biobank  
44 results could be tested. The similar pattern of results in HSE-SHS and UKB suggests that the  
45 key findings are generalisable, at least to the British population.  
46  
47  
48  
49  
50  
51  
52  
53

54  
55 Within Biobank, the large numbers permitted subgroup analyses by sex, age, obesity and pre-  
56 existing disease, of sufficient statistical power to exclude important interaction effects. These  
57  
58  
59  
60

1  
2  
3 within-cohort comparisons provide further reassurance about the generalisability of the  
4  
5 principal findings among lifelong non-smokers.  
6  
7

8  
9 Although only 58% of the Biobank cohort performed spirometry which fulfilled internationally  
10  
11 recommended criteria for acceptability and reproducibility,<sup>17</sup> the results in this subgroup were  
12  
13 very similar to those among the full set of Biobank participants who performed “usable”  
14  
15 spirometry. Those results were, in turn, consistent with the findings from national health  
16  
17 surveys where the acceptability and reproducibility of spirometry was not formally assessed in  
18  
19 the field. These within-cohort and cross-cohort comparisons suggest that the principal findings  
20  
21 are robust to inclusion or exclusion of participants with suboptimal spirometric performance.  
22  
23

24  
25  
26 In common with previous studies of this topic, our analysis was restricted to fatal outcomes  
27  
28 and therefore cannot distinguish between an influence of reduced ventilatory function on  
29  
30 disease incidence and an effect on case-fatality. The association with cancer mortality was  
31  
32 weaker among those with no cancer diagnosis at entry, suggesting an association primarily  
33  
34 with case-fatality. In contrast, the association of spirometric indices with circulatory mortality  
35  
36 was equally strong in those with and without a prior history of circulatory disease. The recent  
37  
38 linkage of hospital admissions and primary care consultations to the UK Biobank cohort will  
39  
40 allow associations with incidence and case-fatality to be investigated more directly in future.  
41  
42  
43  
44  
45  
46  
47  
48

#### 49 **Comparison with other studies**

50  
51  
52 Previous studies of lifelong non-smokers have been of limited size: 662 males and 2048  
53  
54 females in the Copenhagen City Heart Study, of whom 195 died during 10 years of follow-up,<sup>3</sup>  
55  
56 and 3562 male London civil servants in the Whitehall Study, of whom 408 died over a period  
57  
58 of 18 years.<sup>4</sup> The Whitehall cohort was subsequently followed for 33-35 years, accumulating  
59  
60 1545 deaths among 3083 lifelong non-smokers.<sup>19</sup> In the analyses we present here, there are

1  
2  
3 almost twice this number of deaths among lifelong non-smokers, despite a shorter follow-up  
4  
5 period, due to the much larger sample size at entry, particularly in UK Biobank.  
6  
7

8  
9 The two publications from the Whitehall cohort<sup>4,19</sup> compared FEV1 and height as predictors of  
10  
11 all-cause and cause-specific mortality among never-smokers. The first<sup>4</sup> found that FEV1  
12  
13 predicted mortality independent of height, but height did not predict survival independent of  
14  
15 FEV1. The second<sup>19</sup> found that FEV1 and height were similarly related both to mortality and  
16  
17 to a range of other risk factors, concluding that both FEV1 and height may be markers of early  
18  
19 life exposures of relevance to longevity.  
20  
21

22  
23 Published analyses of the Whitehall cohort<sup>4,19</sup> assessed only FEV1 but not FVC. In the  
24  
25 Copenhagen study,<sup>3</sup> the association of all-cause mortality among never-smokers was slightly  
26  
27 stronger and more statistically significant with FVC than with FEV1 (both spirometric indices  
28  
29 analysed as percent predicted for age, sex and height). However, no formal comparison was  
30  
31 made between the mortality risks associated with the two indices. An analysis of mortality over  
32  
33 an average follow-up period of 13.7 years among 7,489 45-64-year-old participants in the  
34  
35 United States ARIC cohort<sup>7</sup> suggested that FVC should be considered as a more predictive  
36  
37 spirometric index than FEV1, but this conclusion was drawn from a cohort of mixed smoking  
38  
39 habits.  
40  
41  
42  
43

44  
45 In our study of lifelong non-smokers, we confirmed that FVC (rather than FEV1) is the index  
46  
47 of greater importance in determining survival in middle-aged never-smokers. In contrast,  
48  
49 among current smokers, FEV1 emerged as the more influential predictor. This may be because  
50  
51 the FEV1/FVC ratio declines with both the dose and duration of smoking, and these also  
52  
53 increase mortality risk.  
54  
55

56  
57  
58 The ability to perform good quality spirometry is an integrated assessment of physical and  
59  
60 cognitive function and therefore might be considered a predictor of mortality in its own right.

1  
2  
3 In the US Six Cities study, excessively variable spirometric performance was an indicator of  
4 poor health and associated with shorter survival.<sup>20</sup> In contrast, the mortality experience of  
5 Biobank participants who produced “best quality” spirograms did not differ greatly from that  
6 of their peers who produced “usable” but not “best quality” blows.  
7  
8  
9  
10  
11

### 12 13 14 15 16 17 **Possible implications**

18  
19 In clinical practice, particularly in primary care, quality control of spirometry is unlikely to be  
20 much better than in the national health surveys where lung function was tested by a trained  
21 research nurse in the home setting. Therefore, while the results from the Biobank “best quality”  
22 subgroup are of confirmatory interest, the more inclusive results for all “usable spirograms”  
23 may be more generally relevant.  
24  
25  
26  
27  
28  
29  
30

31  
32 In both cohorts, age-sex-height-adjusted lung function emerged as a stronger predictor of all-  
33 cause mortality than either systolic blood pressure or body mass index, which are, respectively,  
34 the 2nd and 6th most influential causes worldwide of loss of healthy lifespan, as measured by  
35 disability-adjusted life-years.<sup>21</sup> It is therefore puzzling to find U-shaped or J-shaped  
36 relationships of mortality with these two cardiovascular risk factors, but the similar patterns of  
37 results in Biobank and the national health surveys suggests that this is not a unique feature of  
38 either of these British cohorts.  
39  
40  
41  
42  
43  
44  
45  
46  
47  
48

49 Specifically for circulatory disease mortality, FEV1 and FVC were as strongly predictive as  
50 body mass index, and more strongly predictive than systolic blood pressure. Therefore,  
51 spirometry may deserve consideration as an addition to cardiovascular risk scoring algorithms  
52 in future.  
53  
54  
55  
56  
57  
58  
59  
60

## Conclusion

More generally, these results emphasise the potential importance of promoting and protecting lung health in the general population, even among lifelong non-smokers with no history of respiratory disease.

## Acknowledgements

This research has been conducted using the UK Biobank Resource (application #412) and national health surveys data obtained from the UK Data Archive.

## Role of the funding source

This research has been conducted using the UK Biobank Resource (application #412) and national health surveys data obtained from the UK Data Archive. The analyses presented here were supported by a project grant from the British Lung Foundation (ref: RHotN12-14). Neither UK Biobank nor the UK Data Archive nor the British Lung Foundation have been involved in the writing of the manuscript.

## Ethical approval

This is a secondary analysis of anonymised data from national health surveys, each of which obtained ethics committee approval for their fieldwork,<sup>8-12,15</sup> but no specific ethical approval was required for this data analysis.



## REFERENCES

- 1 Ashley F, Kannel WB, Sorlie PD, *et al.* Pulmonary function: relation to ageing, cigarette habit and mortality. The Framingham Study. *Ann Intern Med* 1975;**82**:739–45.
- 2 Beaty TH, Cohen BH, Newill CA, *et al.* Impaired pulmonary function as a risk factor for mortality. *Am J Epidemiol* 1982;**116**:102–13.
- 3 Lange P, Nyboe J, Appleyard M, Jensen G, Schnohr P. Spirometric findings and mortality in never smokers. *J Clin Epidemiol* 1990;**43**:867–73.
- 4 Strachan DP. Ventilatory function, height and mortality among lifelong non-smokers. *J Epidemiol Community Health* 1992;**46**:66–70.
- 5 Schunemann HJ, Dorn J, Grant BJB, Winkelstein W, Trevisan M. Pulmonary function is a long-term predictor of mortality in the general population. 29-year follow-up of the Buffalo Health Study. *Chest* 2000;**118**:656–64.
- 6 Mannino DM, Buist AS, Petty TL, Enright PL, Redd SC. Lung function and mortality in the United States: data from the First National Health and Nutrition Examination Survey follow up study. *Thorax* 2003;**58**:388–93.
- 7 Burney PG, Hooper R. Forced vital capacity, airway obstruction and survival in a general population sample from the USA. *Thorax* 2011;**66**:49–54.
- 8 Joint Health Surveys Unit of Social and Community Planning Research and University College London. *Health Survey for England, 1995*. [data collection]. 4th Edition. UK Data Service, 2010 [Accessed 5 October 2016]. Available from: <http://dx.doi.org/10.5255/UKDA-SN-3796-1>

- 1  
2  
3  
4 9 Joint Health Surveys Unit of Social and Community Planning Research and University  
5 College London. *Health Survey for England, 1996*. [data collection]. *4th Edition*. UK  
6 Data Service, 2010 [Accessed 5 October 2016]. Available from:  
7 <http://dx.doi.org/10.5255/UKDA-SN-3886-1>  
8  
9  
10  
11  
12  
13 10 National Centre for Social Research, University College London. Department of  
14 Epidemiology and Public Health. *Health Survey for England, 2001*. [data collection].  
15 *3rd Edition*. UK Data Service, 2010 [Accessed 5 October 2016]. Available from:  
16 <http://dx.doi.org/10.5255/UKDA-SN-4628-1>  
17  
18  
19  
20  
21  
22  
23 11 Joint Health Surveys Unit of Social and Community Planning Research and University  
24 College London. *Scottish Health Survey, 1998*. [data collection]. UK Data Service,  
25 2001 [Accessed 5 October 2016]. Available from: [http://dx.doi.org/10.5255/UKDA-](http://dx.doi.org/10.5255/UKDA-SN-4379-1)  
26 [SN-4379-1](http://dx.doi.org/10.5255/UKDA-SN-4379-1)  
27  
28  
29  
30  
31  
32  
33 12 Joint Health Surveys Unit, University College London. *Scottish Health Survey, 2003*.  
34 [data collection]. *2nd Edition*. UK Data Service, 2011 [Accessed 5 October 2016].  
35 Available from: <http://dx.doi.org/10.5255/UKDA-SN-5318-1>  
36  
37  
38  
39  
40  
41 13 Mindell J, Biddulph JP, Hirani V, *et al*. Cohort Profile: The Health Survey for England.  
42 *Int J Epidemiol* 2012;**41**:1585–1593.  
43  
44  
45  
46  
47 14 Gray L, Batty GD, Craig P, *et al*. Cohort Profile: The Scottish Health Surveys Cohort:  
48 linkage of study participants to routinely collected records for mortality, hospital  
49 discharge, cancer and offspring birth characteristics in three nationwide studies. *Int J*  
50 *Epidemiol* 2010;**39**:345–350.  
51  
52  
53  
54  
55  
56  
57 15 Sudlow C, Gallacher J, Allen N, *et al*. UK Biobank: an open access resource for  
58 identifying the causes of a wide range of complex diseases of middle and old age. *PLoS*  
59 *Med* 2015;**12**:e1001779.  
60

- 1  
2  
3  
4 16 UK Biobank: Protocol for a large-scale prospective epidemiological resource.  
5 Protocol No: UKBB-PROT-09-06 (Main Phase). UK Biobank Coordinating Centre,  
6 2007. Available from: [http://www.ukbiobank.ac.uk/wp-content/uploads/2011/11/UK-](http://www.ukbiobank.ac.uk/wp-content/uploads/2011/11/UK-Biobank-Protocol.pdf)  
7 [Biobank-Protocol.pdf](http://www.ukbiobank.ac.uk/wp-content/uploads/2011/11/UK-Biobank-Protocol.pdf) [Accessed 6 October 2016].  
8  
9  
10  
11  
12  
13  
14 17 Miller MR, Crapo R, Hankinson J, *et al*. ATS/ERS Task Force: Standardisation of lung  
15 function testing. General considerations for lung function testing. *Eur Respir J*  
16 2005;**26**:153–161.  
17  
18  
19  
20  
21 18 Quanjer PH, Stanojevic S, Cole TJ, *et al*. Multi-ethnic reference values for spirometry  
22 for the 3-95-yr age range: the global lung function 2012 equations. *Eur Respir J*  
23 2012;**40**:1324–43.  
24  
25  
26  
27  
28  
29 19 Batty GD, Gunnell D, Langenberg C, *et al*. Adult height and lung function as markers  
30 of life course exposures: Associations with risk factors and cause-specific mortality.  
31 *Eur J Epidemiol* 2006;**21**:795–801.  
32  
33  
34  
35  
36  
37 20 Eisen EA, Dockery DW, Speizer FE, *et al*. The association between health status and  
38 the performance of excessively variable spirometry tests in a population study in six  
39 US cities. *Am Rev Respir Dis* 1987;**136**:1371–76.  
40  
41  
42  
43  
44  
45 21 GBD 2013 Risk Factors Collaborators. Global, regional, and national comparative risk  
46 assessment of 79 behavioural, environmental and occupational, and metabolic risks or  
47 clusters of risks in 188 countries, 1990-2013: a systematic analysis for the Global  
48 Burden of Disease Study 2013. *Lancet* 2015;**386**:2287–323.  
49  
50  
51  
52  
53  
54  
55  
56  
57  
58  
59  
60

**Figure 1 title**

Hazard ratios for death from all causes, and from circulatory diseases, by quartile of age-sex-height-adjusted forced vital capacity (zFVC), systolic blood pressure (SBP) and body mass index (BMI) among white lifelong non-smokers aged 40-69 at entry in national health surveys (HSE and SHS) and in UK Biobank

**Figure 1 footnote**

Hazard ratios are adjusted for age, sex, height, socio-economic status, region and survey year. The reference category (HR=1) is the highest quartile (Q4) for zFVC and the lowest quartile (Q1) for SBP and BMI. Whiskers represent the 95% confidence interval for each hazard ratio.

**Figure 1 data**

Included in supplementary e-Table 7

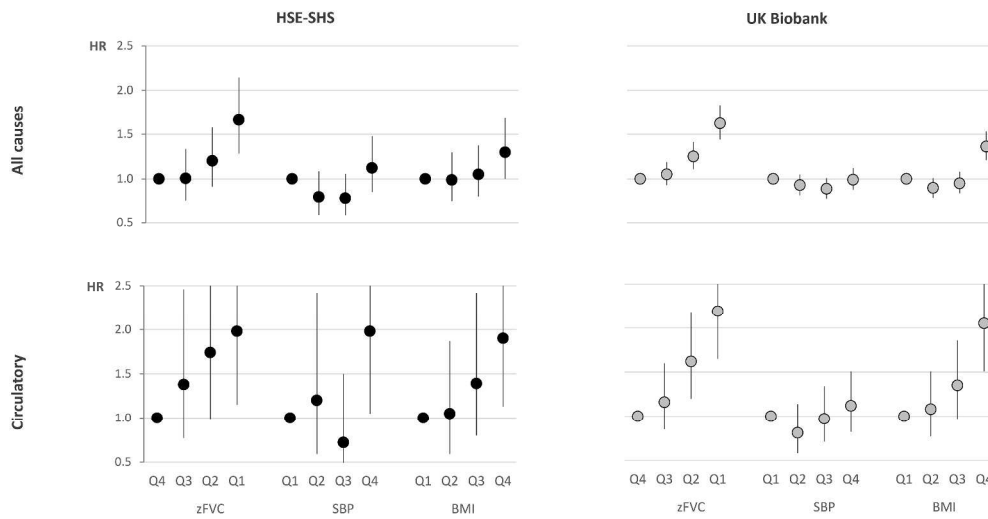

Figure 1 title: Hazard ratios for death from all causes, and from circulatory diseases, by quartile of age-sex-height-adjusted forced vital capacity (zFVC), systolic blood pressure (SBP) and body mass index (BMI) among white lifelong non-smokers aged 40-69 at entry in national health surveys (HSE and SHS) and in UK Biobank.

Figure 1 footnote: Hazard ratios are adjusted for age, sex, height, socio-economic status, region and survey year. The reference category (HR=1) is the highest quartile (Q4) for zFVC and the lowest quartile (Q1) for SBP and BMI. Whiskers represent the 95% confidence intervals for each hazard ratio.

Figure 1 data: Included in supplementary e-Table 7.

2259x1201mm (96 x 96 DPI)

View only

1  
2  
3 **bmjopen-2016-015381 resubmission (unmarked copy)**  
4  
5

6  
7 **SUPPLEMENTARY MATERIAL**  
8

9  
10  
11 **Title**

12 Ventilatory function as a predictor of mortality in lifelong non-smokers: evidence from large British cohort studies  
13  
14

15  
16  
17 **Authors**

18 Ramyani P Gupta, MSc<sup>1</sup>, David P Strachan, MD<sup>1</sup>  
19  
20

21  
22  
23 **Affiliations**

24  
25 1. Population Health Research Institute, St George's, University of London, UK  
26  
27

28  
29 **Corresponding author**

30  
31 David P Strachan  
32 Professor of Epidemiology  
33 Population Health Research Institute  
34 St George's, University of London  
35 Cranmer Terrace  
36 London SW17 0RE  
37 United Kingdom  
38 Tel: +44 (0) 208 735 5429  
39 Email: d.strachan@sgul.ac.uk  
40  
41  
42

**e-Table 1** Descriptive characteristics of participants in the Health Surveys for England and Scottish Health Surveys, and in UK Biobank

| <i>Characteristic</i>                                | <i>Smoking history</i> | <i>HSE-SHS age 40-69 at entry,<br/>white ethnicity</i> |                | <i>HSE-SHS age 70+ at entry,<br/>white ethnicity</i> |                | <i>UK Biobank age 40-69 at entry,<br/>white ethnicity</i> |                |
|------------------------------------------------------|------------------------|--------------------------------------------------------|----------------|------------------------------------------------------|----------------|-----------------------------------------------------------|----------------|
|                                                      |                        | <i>Males</i>                                           | <i>Females</i> | <i>Males</i>                                         | <i>Females</i> | <i>Males</i>                                              | <i>Females</i> |
| Number of subjects included in Cox regression models | Never smokers          | 2343                                                   | 4236           | 345                                                  | 1084           | 56924                                                     | 92419          |
|                                                      | Former smokers         | 3336                                                   | 3243           | 753                                                  | 676            | 89542                                                     | 102085         |
|                                                      | Current smokers        | 3430                                                   | 3149           | 813                                                  | 616            | 19909                                                     | 18605          |
| Mean follow-up period (years)                        | Never smokers          | 13.75                                                  | 13.93          | 12.26                                                | 13.03          | 6.52                                                      | 6.54           |
|                                                      | Former smokers         | 14.41                                                  | 14.35          | 12.87                                                | 13.84          | 6.46                                                      | 6.50           |
|                                                      | Current smokers        | 14.46                                                  | 14.11          | 13.39                                                | 13.52          | 6.47                                                      | 6.54           |
| All deaths                                           | Never smokers          | 178                                                    | 322            | 195                                                  | 588            | 1143                                                      | 1258           |
|                                                      | Former smokers         | 758                                                    | 455            | 1072                                                 | 811            | 2714                                                      | 1714           |
|                                                      | Current smokers        | 732                                                    | 539            | 406                                                  | 260            | 1096                                                      | 580            |
| Respiratory deaths                                   | Never smokers          | 13                                                     | 21             | 30                                                   | 88             | 41                                                        | 28             |
|                                                      | Former smokers         | 117                                                    | 68             | 220                                                  | 127            | 131                                                       | 66             |
|                                                      | Current smokers        | 190                                                    | 165            | 142                                                  | 79             | 69                                                        | 37             |
| Circulatory deaths                                   | Never smokers          | 51                                                     | 79             | 63                                                   | 236            | 270                                                       | 161            |
|                                                      | Former smokers         | 272                                                    | 118            | 415                                                  | 330            | 668                                                       | 192            |
|                                                      | Current smokers        | 255                                                    | 125            | 126                                                  | 86             | 278                                                       | 88             |
| Cancer deaths                                        | Never smokers          | 80                                                     | 161            | 56                                                   | 110            | 640                                                       | 895            |
|                                                      | Former smokers         | 290                                                    | 219            | 283                                                  | 165            | 1530                                                      | 1232           |
|                                                      | Current smokers        | 283                                                    | 249            | 132                                                  | 65             | 555                                                       | 382            |
| Other non-respiratory deaths                         | Never smokers          | 37                                                     | 68             | 50                                                   | 158            | 192                                                       | 174            |
|                                                      | Former smokers         | 123                                                    | 81             | 212                                                  | 223            | 385                                                       | 224            |
|                                                      | Current smokers        | 114                                                    | 96             | 61                                                   | 56             | 194                                                       | 73             |

e-Table 2 Relationship of spirometric indices to mortality before and after 5 years among younger and older subjects, by smoking habit, in the Health Surveys for England and Scottish Health Surveys

| Timing of death       | Smoking history | <i>HSE-SHS age 40-69 at entry, white ethnicity</i> |                  |                  | <i>HSE-SHS age 70+ at entry, white ethnicity</i> |                  |                  |
|-----------------------|-----------------|----------------------------------------------------|------------------|------------------|--------------------------------------------------|------------------|------------------|
|                       |                 | Total N (deaths)                                   | zFEV1 HR (95%CI) | zFVC HR (95%CI)  | Total N (deaths)                                 | zFEV1 HR (95%CI) | zFVC HR (95%CI)  |
| All deaths            | Never smokers   | 6579 (500)                                         | 1.17 (1.09-1.25) | 1.19 (1.10-1.28) | 1429 (783)                                       | 1.24 (1.17-1.32) | 1.22 (1.15-1.29) |
|                       | Former smokers  | 9403 (1212)                                        | 1.33 (1.28-1.39) | 1.31 (1.25-1.37) | 3083 (1883)                                      | 1.23 (1.19-1.28) | 1.20 (1.16-1.25) |
|                       | Current smokers | 6640 (1271)                                        | 1.30 (1.24-1.35) | 1.20 (1.15-1.26) | 909 (666)                                        | 1.36 (1.28-1.46) | 1.23 (1.16-1.31) |
| Deaths within 5 years | Never smokers   | 6579 (103)                                         | 1.35 (1.17-1.56) | 1.35 (1.16-1.57) | 1429 (217)                                       | 1.37 (1.23-1.54) | 1.38 (1.24-1.54) |
|                       | Former smokers  | 9403 (288)                                         | 1.43 (1.32-1.55) | 1.49 (1.37-1.63) | 3083 (590)                                       | 1.33 (1.25-1.41) | 1.28 (1.20-1.36) |
|                       | Current smokers | 6640 (332)                                         | 1.31 (1.21-1.43) | 1.24 (1.15-1.35) | 909 (250)                                        | 1.33 (1.20-1.48) | 1.19 (1.08-1.32) |
| Deaths after 5 years  | Never smokers   | 6476 (397)                                         | 1.12 (1.03-1.21) | 1.14 (1.05-1.24) | 1212 (566)                                       | 1.19 (1.11-1.28) | 1.15 (1.07-1.24) |
|                       | Former smokers  | 9115 (924)                                         | 1.29 (1.23-1.36) | 1.25 (1.19-1.32) | 2493 (1293)                                      | 1.19 (1.14-1.24) | 1.17 (1.12-1.22) |
|                       | Current smokers | 6308 (939)                                         | 1.29 (1.23-1.36) | 1.18 (1.12-1.25) | 659 (416)                                        | 1.38 (1.27-1.50) | 1.25 (1.15-1.36) |

Spirometric indices (FEV1, FVC and FEV1/FVC ratio) are modelled as z-scores derived from the Global Lung Initiative 2012 reference equations for whites. All hazard ratios are expressed per unit decrement in z-score, adjusted for age, sex, height, socio-economic status, geographical region and survey year.



**e-Table 3 Relationship of spirometric indices to all-cause mortality before and after 5 years, among males and females, and among younger and older subjects, by smoking habit, in UK Biobank**

*Biobank age 40-69, white ethnicity, all usable spirograms*

| <i>Subjects and timing of death</i>  | <i>Smoking history</i> | <i>Total N (deaths)</i> | <i>zFEV1 HR (95%CI)</i> | <i>zFVC HR (95%CI)</i> |
|--------------------------------------|------------------------|-------------------------|-------------------------|------------------------|
| All subjects, deaths within 5 years  | Never smokers          | 149343 (1599)           | 1.23 (1.17-1.28)        | 1.26 (1.20-1.32)       |
|                                      | Former smokers         | 191627 (2998)           | 1.40 (1.36-1.45)        | 1.40 (1.35-1.45)       |
|                                      | Current smokers        | 38514 (1112)            | 1.39 (1.32-1.46)        | 1.29 (1.22-1.36)       |
| All subjects, deaths after 5 years   | Never smokers          | 147744 (802)            | 1.18 (1.11-1.26)        | 1.21 (1.13-1.29)       |
|                                      | Former smokers         | 188629 (1430)           | 1.33 (1.27-1.39)        | 1.32 (1.25-1.38)       |
|                                      | Current smokers        | 37402 (564)             | 1.37 (1.28-1.47)        | 1.30 (1.20-1.40)       |
| Males, all deaths                    | Never smokers          | 56924 (1143)            | 1.24 (1.18-1.31)        | 1.28 (1.21-1.35)       |
|                                      | Former smokers         | 89542 (2714)            | 1.39 (1.34-1.43)        | 1.39 (1.34-1.44)       |
|                                      | Current smokers        | 19909 (1096)            | 1.36 (1.30-1.43)        | 1.27 (1.21-1.34)       |
| Females, all deaths                  | Never smokers          | 92419 (1258)            | 1.18 (1.12-1.24)        | 1.20 (1.14-1.27)       |
|                                      | Former smokers         | 102085 (1714)           | 1.37 (1.31-1.43)        | 1.34 (1.28-1.40)       |
|                                      | Current smokers        | 18605 (580)             | 1.42 (1.33-1.52)        | 1.33 (1.23-1.43)       |
| Age 40-59 at entry, all deaths       | Never smokers          | 90676 (872)             | 1.23 (1.16-1.31)        | 1.25 (1.17-1.33)       |
|                                      | Former smokers         | 101171 (1161)           | 1.36 (1.29-1.43)        | 1.37 (1.30-1.45)       |
|                                      | Current smokers        | 25584 (692)             | 1.39 (1.31-1.48)        | 1.27 (1.19-1.36)       |
| Age 60-69 at entry, all deaths       | Never smokers          | 58667 (1529)            | 1.20 (1.15-1.26)        | 1.23 (1.18-1.29)       |
|                                      | Former smokers         | 90456 (3267)            | 1.39 (1.35-1.43)        | 1.37 (1.33-1.42)       |
|                                      | Current smokers        | 12930 (984)             | 1.38 (1.31-1.45)        | 1.31 (1.24-1.39)       |
| BMI<30kg/m <sup>2</sup> , all deaths | Never smokers          | 113932 (1628)           | 1.17 (1.11-1.22)        | 1.19 (1.14-1.25)       |
|                                      | Former smokers         | 142418 (2893)           | 1.35 (1.30-1.39)        | 1.32 (1.27-1.37)       |
|                                      | Current smokers        | 29638 (1266)            | 1.37 (1.30-1.43)        | 1.27 (1.21-1.33)       |
| BMI≥30kg/m <sup>2</sup> , all deaths | Never smokers          | 33367 (696)             | 1.19 (1.11-1.27)        | 1.18 (1.10-1.27)       |
|                                      | Former smokers         | 46624 (1403)            | 1.36 (1.30-1.43)        | 1.37 (1.30-1.44)       |
|                                      | Current smokers        | 8326 (365)              | 1.49 (1.36-1.63)        | 1.44 (1.31-1.59)       |

Spirometric indices (FEV1 and FVC) are modelled as z-scores derived from the Global Lung Initiative 2012 reference equations for whites.

All hazard ratios are expressed per unit decrement in z-score, adjusted for age, sex, height, socio-economic status and geographical region (recruitment centre).

**e-Table 4 Comparison of best quality spiromgrams with all usable spiromgrams to predict all-cause and cause-specific mortality, by smoking habit, in UK Biobank**

| Cause of death                 | Smoking history | Biobank age 40-69, white ethnicity, best spiromgrams |                  |                  | Biobank age 40-69, white ethnicity, usable spiromgrams |                  |                  |
|--------------------------------|-----------------|------------------------------------------------------|------------------|------------------|--------------------------------------------------------|------------------|------------------|
|                                |                 | Total N (deaths)                                     | zFEV1 HR (95%CI) | zFVC HR (95%CI)  | Total N (deaths)                                       | zFEV1 HR (95%CI) | zFVC HR (95%CI)  |
| All causes                     | Never smokers   | 102945 (1583)                                        | 1.23 (1.18-1.29) | 1.29 (1.23-1.35) | 149343 (2401)                                          | 1.21 (1.17-1.26) | 1.24 (1.19-1.29) |
|                                | Former smokers  | 134173 (3043)                                        | 1.39 (1.35-1.44) | 1.40 (1.35-1.45) | 191627 (4428)                                          | 1.38 (1.35-1.42) | 1.37 (1.33-1.41) |
|                                | Current smokers | 26105 (1079)                                         | 1.39 (1.32-1.46) | 1.30 (1.23-1.38) | 38514 (1676)                                           | 1.38 (1.33-1.44) | 1.29 (1.24-1.35) |
| Respiratory diseases           | Never smokers   | 102945 (48)                                          | 2.07 (1.63-2.62) | 2.22 (1.76-2.80) | 149343 (69)                                            | 1.86 (1.53-2.27) | 2.15 (1.77-2.61) |
|                                | Former smokers  | 134173 (140)                                         | 2.52 (2.20-2.88) | 2.28 (1.98-2.63) | 191627 (197)                                           | 2.46 (2.20-2.76) | 2.26 (2.01-2.54) |
|                                | Current smokers | 26105 (66)                                           | 2.93 (2.37-3.62) | 2.44 (1.99-3.00) | 38514 (106)                                            | 2.52 (2.15-2.96) | 2.08 (1.76-2.45) |
| Circulatory diseases           | Never smokers   | 102945 (269)                                         | 1.46 (1.31-1.62) | 1.57 (1.41-1.76) | 149343 (431)                                           | 1.41 (1.30-1.53) | 1.47 (1.35-1.60) |
|                                | Former smokers  | 134173 (590)                                         | 1.56 (1.46-1.68) | 1.66 (1.54-1.79) | 191627 (860)                                           | 1.58 (1.49-1.67) | 1.64 (1.54-1.74) |
|                                | Current smokers | 26105 (219)                                          | 1.43 (1.28-1.60) | 1.45 (1.28-1.63) | 38514 (366)                                            | 1.41 (1.30-1.54) | 1.38 (1.26-1.52) |
| Cancer                         | Never smokers   | 102945 (1023)                                        | 1.10 (1.04-1.16) | 1.13 (1.07-1.20) | 149343 (1535)                                          | 1.08 (1.03-1.13) | 1.10 (1.05-1.15) |
|                                | Former smokers  | 134173 (1907)                                        | 1.27 (1.22-1.32) | 1.25 (1.20-1.31) | 191627 (2762)                                          | 1.25 (1.21-1.30) | 1.23 (1.18-1.27) |
|                                | Current smokers | 26105 (624)                                          | 1.27 (1.19-1.36) | 1.18 (1.09-1.27) | 38514 (937)                                            | 1.28 (1.22-1.36) | 1.20 (1.13-1.27) |
| Other non-respiratory diseases | Never smokers   | 102945 (243)                                         | 1.44 (1.29-1.61) | 1.51 (1.35-1.69) | 149343 (366)                                           | 1.46 (1.33-1.59) | 1.45 (1.32-1.59) |
|                                | Former smokers  | 134173 (406)                                         | 1.43 (1.31-1.56) | 1.49 (1.36-1.63) | 191627 (609)                                           | 1.41 (1.32-1.51) | 1.43 (1.33-1.55) |
|                                | Current smokers | 26105 (170)                                          | 1.36 (1.20-1.55) | 1.25 (1.08-1.44) | 38514 (267)                                            | 1.36 (1.23-1.51) | 1.25 (1.12-1.39) |

Spirometric indices (FEV1 and FVC) are modelled as z-scores derived from the Global Lung Initiative 2012 reference equations for whites.

All hazard ratios are expressed per unit decrement in z-score, adjusted for age, sex, height, socio-economic status and geographical region (recruitment centre).

1  
2  
3  
4  
5  
6  
7  
8  
9  
10  
11  
12  
13  
14  
15  
16  
17  
18  
19  
20  
21  
22  
23  
24  
25  
26  
27  
28  
29  
30  
31  
32  
33  
34  
35  
36  
37  
38  
39  
40  
41  
42  
43  
44  
45  
46  
47

**e-Table 5 Relationship of spirometric indices to all-cause and cause-specific mortality among younger and older subjects, by smoking habit, in the Health Surveys for England and Scottish Health Surveys**

| Cause of death                 | Smoking history | HSE-SHS age 40-69 at entry, white ethnicity |                  |                  | HSE-SHS age 70+ at entry, white ethnicity |                  |                  |
|--------------------------------|-----------------|---------------------------------------------|------------------|------------------|-------------------------------------------|------------------|------------------|
|                                |                 | Total N (deaths)                            | zFEV1 HR (95%CI) | zFVC HR (95%CI)  | Total N (deaths)                          | zFEV1 HR (95%CI) | zFVC HR (95%CI)  |
| All causes                     | Never smokers   | 6579 (500)                                  | 1.17 (1.09-1.25) | 1.19 (1.10-1.28) | 1429 (783)                                | 1.24 (1.17-1.32) | 1.22 (1.15-1.29) |
|                                | Former smokers  | 9403 (1212)                                 | 1.33 (1.28-1.39) | 1.31 (1.25-1.37) | 3083 (1883)                               | 1.23 (1.19-1.28) | 1.20 (1.16-1.25) |
|                                | Current smokers | 6640 (1271)                                 | 1.30 (1.24-1.35) | 1.20 (1.15-1.26) | 909 (666)                                 | 1.36 (1.28-1.46) | 1.23 (1.16-1.31) |
| Respiratory diseases           | Never smokers   | 6579 (34)                                   | 1.72 (1.34-2.21) | 1.61 (1.25-2.08) | 1429 (118)                                | 1.82 (1.54-2.14) | 1.65 (1.41-1.93) |
|                                | Former smokers  | 9403 (185)                                  | 1.97 (1.77-2.19) | 1.71 (1.53-1.91) | 3083 (347)                                | 1.65 (1.52-1.79) | 1.46 (1.34-1.59) |
|                                | Current smokers | 6640 (355)                                  | 1.70 (1.56-1.84) | 1.40 (1.29-1.52) | 909 (221)                                 | 1.90 (1.69-2.13) | 1.50 (1.34-1.67) |
| Circulatory diseases           | Never smokers   | 6579 (130)                                  | 1.21 (1.06-1.38) | 1.22 (1.06-1.40) | 1429 (299)                                | 1.26 (1.13-1.39) | 1.28 (1.16-1.41) |
|                                | Former smokers  | 9403 (390)                                  | 1.37 (1.28-1.48) | 1.39 (1.28-1.50) | 3083 (745)                                | 1.20 (1.13-1.27) | 1.22 (1.15-1.29) |
|                                | Current smokers | 6640 (380)                                  | 1.26 (1.17-1.36) | 1.22 (1.12-1.32) | 909 (212)                                 | 1.21 (1.08-1.35) | 1.20 (1.07-1.34) |
| Cancer                         | Never smokers   | 6579 (241)                                  | 1.10 (1.00-1.22) | 1.12 (1.01-1.24) | 1429 (166)                                | 1.08 (0.95-1.23) | 1.09 (0.96-1.24) |
|                                | Former smokers  | 9403 (509)                                  | 1.18 (1.10-1.26) | 1.14 (1.06-1.22) | 3083 (448)                                | 1.19 (1.10-1.28) | 1.14 (1.05-1.22) |
|                                | Current smokers | 6640 (532)                                  | 1.21 (1.13-1.29) | 1.09 (1.02-1.17) | 909 (197)                                 | 1.20 (1.07-1.34) | 1.08 (0.96-1.21) |
| Other non-respiratory diseases | Never smokers   | 6579 (105)                                  | 1.15 (0.98-1.34) | 1.20 (1.03-1.41) | 1429 (208)                                | 1.11 (0.98-1.25) | 1.04 (0.92-1.17) |
|                                | Former smokers  | 9403 (204)                                  | 1.22 (1.10-1.35) | 1.32 (1.18-1.48) | 3083 (435)                                | 1.11 (1.03-1.20) | 1.08 (1.00-1.17) |
|                                | Current smokers | 6640 (210)                                  | 1.11 (1.00-1.24) | 1.15 (1.03-1.28) | 909 (117)                                 | 1.20 (1.03-1.40) | 1.11 (0.95-1.29) |

Spirometric indices (FEV1 and FVC) are modelled as z-scores derived from the Global Lung Initiative 2012 reference equations for whites. All hazard ratios are expressed per unit decrement in z-score, adjusted for age, sex, height, socio-economic status, geographical region and survey year.

e-Table 6 Spirometric prediction of mortality among subjects with and without a history of selected diseases at entry, by smoking habit, in UK Biobank

| Condition and cause of death                    | Smoking history | Biobank age 40-69, white, no history of condition |                  |                  | Biobank age 40-69, white, with history of condition |                  |                  |
|-------------------------------------------------|-----------------|---------------------------------------------------|------------------|------------------|-----------------------------------------------------|------------------|------------------|
|                                                 |                 | Total N (deaths)                                  | zFEV1 HR (95%CI) | zFVC HR (95%CI)  | Total N (deaths)                                    | zFEV1 HR (95%CI) | zFVC HR (95%CI)  |
| Respiratory disease at entry, all deaths        | Never smokers   | 130798 (2081)                                     | 1.21 (1.16-1.26) | 1.22 (1.17-1.27) | 18545 (320)                                         | 1.23 (1.12-1.35) | 1.33 (1.21-1.47) |
|                                                 | Former smokers  | 166259 (3711)                                     | 1.36 (1.32-1.40) | 1.34 (1.30-1.38) | 25368 (717)                                         | 1.48 (1.39-1.57) | 1.48 (1.39-1.58) |
|                                                 | Current smokers | 33491 (1352)                                      | 1.32 (1.26-1.38) | 1.21 (1.15-1.27) | 5023 (324)                                          | 1.53 (1.39-1.68) | 1.48 (1.35-1.63) |
| Circulatory disease at entry, circulatory death | Never smokers   | 109141 (189)                                      | 1.40 (1.23-1.59) | 1.40 (1.23-1.60) | 40202 (242)                                         | 1.35 (1.20-1.51) | 1.43 (1.27-1.60) |
|                                                 | Former smokers  | 131593 (281)                                      | 1.39 (1.26-1.54) | 1.40 (1.26-1.57) | 60034 (579)                                         | 1.59 (1.48-1.70) | 1.64 (1.52-1.77) |
|                                                 | Current smokers | 27843 (162)                                       | 1.32 (1.16-1.50) | 1.29 (1.12-1.48) | 10671 (204)                                         | 1.42 (1.26-1.59) | 1.36 (1.20-1.54) |
| Cancer at entry, cancer death                   | Never smokers   | 137742 (978)                                      | 1.05 (0.99-1.11) | 1.06 (1.00-1.12) | 11601 (557)                                         | 1.10 (1.02-1.18) | 1.13 (1.04-1.22) |
|                                                 | Former smokers  | 174917 (1898)                                     | 1.21 (1.16-1.26) | 1.18 (1.13-1.23) | 16710 (864)                                         | 1.32 (1.25-1.40) | 1.30 (1.22-1.38) |
|                                                 | Current smokers | 35573 (738)                                       | 1.29 (1.22-1.37) | 1.18 (1.10-1.26) | 2941 (199)                                          | 1.24 (1.11-1.39) | 1.28 (1.12-1.45) |

Spirometric indices (FEV1 and FVC) are modelled as z-scores derived from the Global Lung Initiative 2012 reference equations for whites.

All hazard ratios are expressed per unit decrement in z-score, adjusted for age, sex, height, area-based socio-economic measure and geographical region (recruitment centre)..

1  
2  
3  
4  
5  
6  
7  
8  
9  
10  
11  
12  
13  
14  
15  
16  
17  
18  
19  
20  
21  
22  
23  
24  
25  
26  
27  
28  
29  
30  
31  
32  
33  
34  
35  
36  
37  
38  
39  
40  
41  
42  
43  
44  
45  
46  
47

**e-Table 7 Mortality from all causes, and from circulatory diseases, by quartile of systolic blood pressure, body mass index and spirometric indices among white lifelong non-smokers aged 40-69 at entry in national health surveys (HSE and SHS) and in UK Biobank**

| Risk factor | Quartile  | All-cause mortality                         |             |                                              |             | Circulatory mortality                       |             |                                             |             |
|-------------|-----------|---------------------------------------------|-------------|----------------------------------------------|-------------|---------------------------------------------|-------------|---------------------------------------------|-------------|
|             |           | HSE-SHS HR (95%CI)<br>(based on 495 deaths) |             | Biobank HR (95%CI)<br>(based on 2319 deaths) |             | HSE-SHS HR (95%CI)<br>(based on 129 deaths) |             | Biobank HR (95%CI)<br>(based on 403 deaths) |             |
| SBP         | Q1 (low)  | 1.00                                        | (reference) | 1.00                                         | (reference) | 1.00                                        | (reference) | 1.00                                        | (reference) |
|             | Q2        | 0.80                                        | (0.59-1.09) | 0.93                                         | (0.82-1.05) | 1.20                                        | (0.59-2.42) | 0.81                                        | (0.58-1.14) |
|             | Q3        | 0.78                                        | (0.58-1.06) | 0.89                                         | (0.78-1.01) | 0.72                                        | (0.34-1.50) | 0.97                                        | (0.71-1.34) |
|             | Q4 (high) | 1.12                                        | (0.85-1.48) | 0.99                                         | (0.88-1.12) | 1.98                                        | (1.05-3.72) | 1.12                                        | (0.82-1.51) |
| BMI         | Q1 (low)  | 1.00                                        | (reference) | 1.00                                         | (reference) | 1.00                                        | (reference) | 1.00                                        | (reference) |
|             | Q2        | 0.99                                        | (0.75-1.3)  | 0.90                                         | (0.79-1.01) | 1.05                                        | (0.59-1.87) | 1.08                                        | (0.77-1.51) |
|             | Q3        | 1.05                                        | (0.8-1.37)  | 0.95                                         | (0.84-1.08) | 1.39                                        | (0.80-2.42) | 1.35                                        | (0.97-1.86) |
|             | Q4 (high) | 1.30                                        | (1-1.68)    | 1.36                                         | (1.21-1.53) | 1.90                                        | (1.13-3.22) | 2.05                                        | (1.51-2.79) |
| zFEV1       | Q4 (high) | 1.00                                        | (reference) | 1.00                                         | (reference) | 1.00                                        | (reference) | 1.00                                        | (reference) |
|             | Q3        | 0.95                                        | (0.71-1.27) | 1.12                                         | (0.99-1.26) | 1.73                                        | (0.93-3.22) | 0.97                                        | (0.71-1.33) |
|             | Q2        | 1.20                                        | (0.91-1.58) | 1.15                                         | (1.01-1.30) | 2.13                                        | (1.16-3.89) | 1.29                                        | (0.96-1.73) |
|             | Q1 (low)  | 1.56                                        | (1.2-2.01)  | 1.60                                         | (1.43-1.79) | 2.24                                        | (1.25-4.04) | 1.99                                        | (1.52-2.61) |
| zFVC        | Q4 (high) | 1.00                                        | (reference) | 1.00                                         | (reference) | 1.00                                        | (reference) | 1.00                                        | (reference) |
|             | Q3        | 1.01                                        | (0.76-1.34) | 1.05                                         | (0.93-1.19) | 1.38                                        | (0.77-2.46) | 1.16                                        | (0.85-1.60) |
|             | Q2        | 1.20                                        | (0.92-1.58) | 1.25                                         | (1.11-1.41) | 1.74                                        | (0.99-3.04) | 1.62                                        | (1.20-2.18) |
|             | Q1 (low)  | 1.66                                        | (1.29-2.14) | 1.62                                         | (1.44-1.82) | 1.98                                        | (1.15-3.40) | 2.19                                        | (1.65-2.92) |

Spirometric indices (FEV1 and FVC) are modelled as z-scores derived from the Global Lung Initiative 2012 reference equations for whites. All hazard ratios are adjusted for age, sex, height, socio-economic status, geographical region and survey year.

1  
2  
3  
4  
5  
6  
7  
8  
9  
10  
11  
12  
13  
14  
15  
16  
17  
18  
19  
20  
21  
22  
23  
24  
25  
26  
27  
28  
29  
30  
31  
32  
33  
34  
35  
36  
37  
38  
39  
40  
41  
42  
43  
44  
45  
46  
47  
48  
49  
50  
51  
52  
53  
54  
55  
56  
57  
58  
59  
60

**bmjopen-2016-015381 – Authors’ response to comments – Annex 3**

**Title** Ventilatory function as a predictor of mortality in lifelong non-smokers: evidence from large British cohort studies

**Authors** Ramyani P Gupta, MSc<sup>1</sup>, David P Strachan, MD<sup>1</sup>

**STROBE Statement**—Checklist of items that should be included in reports of *cohort studies*

|                              | <b>Item No</b> | <b>Recommendation</b>                                                                                                                                                                                                                                                                                                                                                                                                                                                                                                                                                                                                                                                            |
|------------------------------|----------------|----------------------------------------------------------------------------------------------------------------------------------------------------------------------------------------------------------------------------------------------------------------------------------------------------------------------------------------------------------------------------------------------------------------------------------------------------------------------------------------------------------------------------------------------------------------------------------------------------------------------------------------------------------------------------------|
| <b>Title and abstract</b>    | 1              | (a) Indicate the study’s design with a commonly used term in the title or the abstract<br>“Cohort” included in the title                                                                                                                                                                                                                                                                                                                                                                                                                                                                                                                                                         |
|                              |                | (b) Provide in the abstract an informative and balanced summary of what was done and what was found. See page 3.                                                                                                                                                                                                                                                                                                                                                                                                                                                                                                                                                                 |
| <b>Introduction</b>          |                |                                                                                                                                                                                                                                                                                                                                                                                                                                                                                                                                                                                                                                                                                  |
| Background/rationale         | 2              | Explain the scientific background and rationale for the investigation being reported<br>Text (pages 5-6) explains the reason for focusing on lifelong non-smokers.                                                                                                                                                                                                                                                                                                                                                                                                                                                                                                               |
| Objectives                   | 3              | State specific objectives, including any prespecified hypotheses. Text (p5) explains the rationale for comparing findings from two longitudinal data sources.                                                                                                                                                                                                                                                                                                                                                                                                                                                                                                                    |
| <b>Methods</b>               |                |                                                                                                                                                                                                                                                                                                                                                                                                                                                                                                                                                                                                                                                                                  |
| Study design                 | 4              | Present key elements of study design early in the paper. The longitudinal potential of each data source (national health surveys and UK Biobank) is introduced at the start of the relevant section of the methods (text p6-7).                                                                                                                                                                                                                                                                                                                                                                                                                                                  |
| Setting                      | 5              | Describe the setting, locations, and relevant dates, including periods of recruitment, exposure, follow-up, and data collection. Separately specified for national health surveys (p6) and UK Biobank (p7).                                                                                                                                                                                                                                                                                                                                                                                                                                                                      |
| Participants                 | 6              | (a) Give the eligibility criteria, and the sources and methods of selection of participants. Describe methods of follow-up. Separately specified for national health surveys (p6) and UK Biobank (p7)<br>(b) For matched studies, give matching criteria and number of exposed and unexposed. Not applicable.                                                                                                                                                                                                                                                                                                                                                                    |
| Variables                    | 7              | Clearly define all outcomes, exposures, predictors, potential confounders, and effect modifiers. Give diagnostic criteria, if applicable. Cause of death coding (outcome) and spirometric assessment (main exposure of interest) are specified. Potentially confounding covariates adjusted for in all models are described briefly (p7-8). Effect modification is addressed by stratified analyses. All analyses are restricted to participants of white ethnicity due to uncertainty about the most appropriate method of adjustment of spirometry for age, sex and height in non-whites, and the small and diverse nature of the minority ethnic groups in both data sources. |
| Data sources/<br>measurement | 8*             | For each variable of interest, give sources of data and details of methods of assessment (measurement). Describe comparability of assessment methods if there is more than one group. Spirometric methods are separately specified for national health surveys and UK Biobank (p6-7).                                                                                                                                                                                                                                                                                                                                                                                            |

|    |                        |    |                                                                                                                                                                                                                                                                                                                                                                                                                                                                                                                                                                                                                                                                                                                                                                                                                                                                                                                                                                                                                                                                                                                                                                                                                                                                                                                                                                                                                                                                                                   |
|----|------------------------|----|---------------------------------------------------------------------------------------------------------------------------------------------------------------------------------------------------------------------------------------------------------------------------------------------------------------------------------------------------------------------------------------------------------------------------------------------------------------------------------------------------------------------------------------------------------------------------------------------------------------------------------------------------------------------------------------------------------------------------------------------------------------------------------------------------------------------------------------------------------------------------------------------------------------------------------------------------------------------------------------------------------------------------------------------------------------------------------------------------------------------------------------------------------------------------------------------------------------------------------------------------------------------------------------------------------------------------------------------------------------------------------------------------------------------------------------------------------------------------------------------------|
| 1  | Bias                   | 9  | Describe any efforts to address potential sources of bias. Possible lack of generalisability in UK Biobank is dealt with by comparing results to national health surveys which are more representative of the UK population. Possible influence of spirometry quality is addressed by a supplementary analysis in UK Biobank, restricting to better quality spirometry (p13-14). The major confounding effect of active smoking is excluded by focusing on lifelong non-smokers in both cohorts. However, findings for former and current smokers are shown in supplementary tables (e-Tables 1-6) for completeness.                                                                                                                                                                                                                                                                                                                                                                                                                                                                                                                                                                                                                                                                                                                                                                                                                                                                              |
| 10 | Study size             | 10 | Explain how the study size was arrived at. This is a secondary analysis of national surveys. Both data sources are of fixed size, determined by the original (baseline) surveys which were not specifically designed to answer our study question. Thus, the sample size was not determined by a statistical power calculation. However, we note that both sources are larger than all previous studies of spirometry and survival among lifelong non-smokers (see discussion, p19-20).                                                                                                                                                                                                                                                                                                                                                                                                                                                                                                                                                                                                                                                                                                                                                                                                                                                                                                                                                                                                           |
| 18 | Quantitative variables | 11 | Explain how quantitative variables were handled in the analyses. If applicable, describe which groupings were chosen and why. The same method of adjustment of spirometric measures for age, sex and height was applied to both cohorts and this is described in a specific section of the methods (p8).                                                                                                                                                                                                                                                                                                                                                                                                                                                                                                                                                                                                                                                                                                                                                                                                                                                                                                                                                                                                                                                                                                                                                                                          |
| 23 | Statistical methods    | 12 | (a) Describe all statistical methods, including those used to control for confounding. Modelling approaches are described in a subsection of the methods (p8-10).<br>(b) Describe any methods used to examine subgroups and interactions. Subgroups defined by time of death, cause of death, spirometry quality, age, sex, and presence of respiratory disease, circulatory disease or cancer at baseline examination are described in the results section (tables 1-3) and supplementary tables.<br>(c) Explain how missing data were addressed. Response rates at the original (baseline) examination are specified in the methods section (p6-7). We have no information on mortality rates among the non-participants.<br>(d) If applicable, explain how loss to follow-up was addressed. Not addressed, as mortality ascertainment is complete in both data sources except for participants who emigrate from the UK, which will be very few.<br>(e) Describe any sensitivity analyses. The comparison of findings between cohorts, and the analysis of Biobank participants with better quality spirometry, attempt to confirm the generalisability of key findings. The modelling assumption of proportionality of hazards throughout the follow-up period is tested specifically in each cohort and smoking subgroup (p12). Alternative approaches to pooling the results from the five national health surveys were explored (see annex 2 in response to reviewers and the text at p9). |

## Results

|    |              |     |                                                                                                                                                                                                                                                                                                                                                                                                                                                                                                                                                                                                                                                                         |
|----|--------------|-----|-------------------------------------------------------------------------------------------------------------------------------------------------------------------------------------------------------------------------------------------------------------------------------------------------------------------------------------------------------------------------------------------------------------------------------------------------------------------------------------------------------------------------------------------------------------------------------------------------------------------------------------------------------------------------|
| 50 | Participants | 13* | (a) Report numbers of individuals at each stage of study—eg numbers potentially eligible, examined for eligibility, confirmed eligible, included in the study, completing follow-up, and analysed. Specified briefly for each data source in the methods (p6-7).<br>(b) Give reasons for non-participation at each stage. No information is available on reasons for non-participation. Non-participation in spirometry due to ill-health can be a potential source of bias. However, we were able to compare the mortality experience of Biobank participants who performed higher and lower quality spirometry. This showed no substantial difference (results, p14). |
|----|--------------|-----|-------------------------------------------------------------------------------------------------------------------------------------------------------------------------------------------------------------------------------------------------------------------------------------------------------------------------------------------------------------------------------------------------------------------------------------------------------------------------------------------------------------------------------------------------------------------------------------------------------------------------------------------------------------------------|

|                   |     |                                                                                                                                                                                                                                                                                                                                                                                                                                                                                                                                                                                                                                                                                                                                                                                                                                                                                                                                                                                                                                                                                                                                                                                                                                                                                                     |
|-------------------|-----|-----------------------------------------------------------------------------------------------------------------------------------------------------------------------------------------------------------------------------------------------------------------------------------------------------------------------------------------------------------------------------------------------------------------------------------------------------------------------------------------------------------------------------------------------------------------------------------------------------------------------------------------------------------------------------------------------------------------------------------------------------------------------------------------------------------------------------------------------------------------------------------------------------------------------------------------------------------------------------------------------------------------------------------------------------------------------------------------------------------------------------------------------------------------------------------------------------------------------------------------------------------------------------------------------------|
|                   |     | (c) Consider use of a flow diagram. Considered but not included for sake of brevity.                                                                                                                                                                                                                                                                                                                                                                                                                                                                                                                                                                                                                                                                                                                                                                                                                                                                                                                                                                                                                                                                                                                                                                                                                |
| Descriptive data  | 14* | (a) Give characteristics of study participants (eg demographic, clinical, social) and information on exposures and potential confounders. References (8-16, p21-23) are supplied to the baseline surveys on which this longitudinal follow-up were based.<br>(b) Indicate number of participants with missing data for each variable of interest. Proportions of each cohort with usable spirometry are specified (p6-7).<br>(c) Summarise follow-up time (eg, average and total amount). Described in the abstract and in the methods, separately for each data sources p6-7) and in supplementary e-Table 1.                                                                                                                                                                                                                                                                                                                                                                                                                                                                                                                                                                                                                                                                                      |
| Outcome data      | 15* | Report numbers of outcome events or summary measures over time. Numbers of deaths from each cohort are summarised in the abstract and are specified in all tables, along with the corresponding hazard ratio and the number of subjects included in each model.                                                                                                                                                                                                                                                                                                                                                                                                                                                                                                                                                                                                                                                                                                                                                                                                                                                                                                                                                                                                                                     |
| Main results      | 16  | (a) Give unadjusted estimates and, if applicable, confounder-adjusted estimates and their precision (eg, 95% confidence interval). Make clear which confounders were adjusted for and why they were included. Each table lists the covariates included. All results (hazard ratios) are presented with 95% confidence intervals. We do not consider it appropriate to present unadjusted estimates, but when modelling FEV1 and FEV/FVC ratio jointly, we present results before and after inclusion of the ratio, and similarly for FVC adjusted for FEV/FVC ratio. This is explained in the methods (p9).<br>(b) Report category boundaries when continuous variables were categorized. Not applicable to our tabulated analyses, which are presented per unit change in z-score.<br>(c) If relevant, consider translating estimates of relative risk into absolute risk for a meaningful time period. We do not consider this to be relevant to our paper as the periods of follow-up differ substantially between the cohorts and the baseline mortality risk varies considerably with age. On pages 8-9 we interpret hazard ratios per z-score unit decrement in lung function in terms of mortality change across a 4 unit range typical of the z-scores encountered in lifelong non-smokers. |
| Other analyses    | 17  | Report other analyses done—eg analyses of subgroups and interactions, and sensitivity analyses. Described in the results (especially pages 15 and 17). Supplementary tables include the corresponding results for former smokers and current smokers.                                                                                                                                                                                                                                                                                                                                                                                                                                                                                                                                                                                                                                                                                                                                                                                                                                                                                                                                                                                                                                               |
| <b>Discussion</b> |     |                                                                                                                                                                                                                                                                                                                                                                                                                                                                                                                                                                                                                                                                                                                                                                                                                                                                                                                                                                                                                                                                                                                                                                                                                                                                                                     |
| Key results       | 18  | Summarise key results with reference to study objectives. Done - see pages 18-19.                                                                                                                                                                                                                                                                                                                                                                                                                                                                                                                                                                                                                                                                                                                                                                                                                                                                                                                                                                                                                                                                                                                                                                                                                   |
| Limitations       | 19  | Discuss limitations of the study, taking into account sources of potential bias or imprecision. Discuss both direction and magnitude of any potential bias. Limitations and potential biases are evaluated in the discussion (p18-19).                                                                                                                                                                                                                                                                                                                                                                                                                                                                                                                                                                                                                                                                                                                                                                                                                                                                                                                                                                                                                                                              |
| Interpretation    | 20  | Give a cautious overall interpretation of results considering objectives, limitations, multiplicity of analyses, results from similar studies, and other relevant evidence. Results from previous studies of lifelong non-smokers are discussed (p19-20) and spirometry as a predictor of mortality is set into context by comparison with systolic blood pressure and body mass index (p21). The possibility that the association with mortality represents a predictive relationship with case-fatality, rather than disease incidence, is addressed in the discussion (p19, referring to results in Biobank participants without disease at entry examination – table 3).                                                                                                                                                                                                                                                                                                                                                                                                                                                                                                                                                                                                                        |
| Generalisability  | 21  | Discuss the generalisability (external validity) of the study results. One main objective of this paper is to establish the generalisability of results (within the UK, at least) by comparison of two complementary data sources. See p18-19.                                                                                                                                                                                                                                                                                                                                                                                                                                                                                                                                                                                                                                                                                                                                                                                                                                                                                                                                                                                                                                                      |



1  
2  
3  
4  
5  
6  
7  
8  
9  
10  
11  
12  
13  
14  
15  
16  
17  
18  
19  
20  
21  
22  
23  
24  
25  
26  
27  
28  
29  
30  
31  
32  
33  
34  
35  
36  
37  
38  
39  
40  
41  
42  
43  
44  
45  
46  
47  
48  
49  
50  
51  
52  
53  
54  
55  
56  
57  
58  
59  
60

**Other information**

---

Funding 22 Give the source of funding and the role of the funders for the present study and, if applicable, for the original study on which the present article is based. See p22.

---

For peer review only
