# Supplementary material for: Ventilatory function as a predictor of mortality in lifelong non-smokers: evidence from large British cohort studies
Source: PubMed Central journal article supplement — BMJ Open. 2017 Jul 12;7(7):e015381. doi: 10.1136/bmjopen-2016-015381 (PMC5734388; doi:10.1136/bmjopen-2016-015381), 2017-07-12
Supplement: bmjopen-2016-015381supp001.pdf [file bmjopen-2016-015381supp001.pdf]

**bmjopen-2016-015381 final version**

**SUPPLEMENTARY MATERIAL**

**Title**

Ventilatory function as a predictor of mortality in lifelong non-smokers: evidence from large British cohort studies

**Authors**

Ramyani P Gupta, MSc<sup>1</sup>, David P Strachan, MD<sup>1</sup>

**Affiliations**

1. Population Health Research Institute, St George's, University of London, UK

**Corresponding author**

David P Strachan  
Professor of Epidemiology  
Population Health Research Institute  
St George's, University of London  
Cranmer Terrace  
London SW17 0RE  
United Kingdom  
Tel: +44 (0) 208 735 5429  
Email: d.strachan@sgul.ac.uk

e-Table 1

## Descriptive characteristics of participants in the Health Surveys for England and Scottish Health Surveys, and in UK Biobank

| <i>Characteristic</i>                                | <i>Smoking history</i> | <i>HSE-SHS age 40-69 at entry,<br/>white ethnicity</i> |                | <i>HSE-SHS age 70+ at entry,<br/>white ethnicity</i> |                | <i>UK Biobank age 40-69 at entry,<br/>white ethnicity</i> |                |
|------------------------------------------------------|------------------------|--------------------------------------------------------|----------------|------------------------------------------------------|----------------|-----------------------------------------------------------|----------------|
|                                                      |                        | <i>Males</i>                                           | <i>Females</i> | <i>Males</i>                                         | <i>Females</i> | <i>Males</i>                                              | <i>Females</i> |
| Number of subjects included in Cox regression models | Never smokers          | 2343                                                   | 4236           | 345                                                  | 1084           | 56924                                                     | 92419          |
|                                                      | Former smokers         | 4768                                                   | 4635           | 1624                                                 | 1459           | 89542                                                     | 102085         |
|                                                      | Current smokers        | 3462                                                   | 3178           | 517                                                  | 392            | 19909                                                     | 18605          |
| Mean follow-up period (years)                        | Never smokers          | 13.75                                                  | 13.93          | 12.26                                                | 13.03          | 6.52                                                      | 6.54           |
|                                                      | Former smokers         | 14.41                                                  | 14.35          | 12.87                                                | 13.84          | 6.46                                                      | 6.50           |
|                                                      | Current smokers        | 14.46                                                  | 14.11          | 13.39                                                | 13.52          | 6.47                                                      | 6.54           |
| All deaths                                           | Never smokers          | 178                                                    | 322            | 195                                                  | 588            | 1143                                                      | 1258           |
|                                                      | Former smokers         | 757                                                    | 455            | 1072                                                 | 811            | 2714                                                      | 1714           |
|                                                      | Current smokers        | 732                                                    | 539            | 406                                                  | 260            | 1096                                                      | 580            |
| Respiratory deaths                                   | Never smokers          | 10                                                     | 14             | 26                                                   | 84             | 41                                                        | 28             |
|                                                      | Former smokers         | 72                                                     | 37             | 162                                                  | 93             | 131                                                       | 66             |
|                                                      | Current smokers        | 80                                                     | 69             | 87                                                   | 53             | 69                                                        | 37             |
| Circulatory deaths                                   | Never smokers          | 51                                                     | 79             | 63                                                   | 236            | 270                                                       | 161            |
|                                                      | Former smokers         | 272                                                    | 118            | 415                                                  | 330            | 668                                                       | 192            |
|                                                      | Current smokers        | 255                                                    | 125            | 126                                                  | 86             | 278                                                       | 88             |
| Cancer deaths                                        | Never smokers          | 80                                                     | 161            | 56                                                   | 110            | 640                                                       | 895            |
|                                                      | Former smokers         | 290                                                    | 219            | 283                                                  | 165            | 1530                                                      | 1232           |
|                                                      | Current smokers        | 283                                                    | 249            | 132                                                  | 65             | 555                                                       | 382            |
| Other non-respiratory deaths                         | Never smokers          | 37                                                     | 68             | 50                                                   | 158            | 192                                                       | 174            |
|                                                      | Former smokers         | 123                                                    | 81             | 212                                                  | 223            | 385                                                       | 224            |
|                                                      | Current smokers        | 114                                                    | 96             | 61                                                   | 56             | 194                                                       | 73             |

e-Table 2

**Relationship of spirometric indices to mortality before and after 5 years among younger and older subjects, by smoking habit, in the Health Surveys for England and Scottish Health Surveys**

| <i>Timing of death</i> | <i>Smoking history</i> | <i>HSE-SHS age 40-69 at entry, white ethnicity</i> |                         |                        | <i>HSE-SHS age 70+ at entry, white ethnicity</i> |                         |                        |
|------------------------|------------------------|----------------------------------------------------|-------------------------|------------------------|--------------------------------------------------|-------------------------|------------------------|
|                        |                        | <i>Total N (deaths)</i>                            | <i>zFEV1 HR (95%CI)</i> | <i>zFVC HR (95%CI)</i> | <i>Total N (deaths)</i>                          | <i>zFEV1 HR (95%CI)</i> | <i>zFVC HR (95%CI)</i> |
| All deaths             | Never smokers          | 6579 (500)                                         | 1.17 (1.09-1.25)        | 1.19 (1.10-1.28)       | 1429 (783)                                       | 1.24 (1.17-1.32)        | 1.22 (1.15-1.29)       |
|                        | Former smokers         | 9403 (1212)                                        | 1.33 (1.28-1.39)        | 1.31 (1.25-1.37)       | 3083 (1883)                                      | 1.23 (1.19-1.28)        | 1.20 (1.16-1.25)       |
|                        | Current smokers        | 6640 (1271)                                        | 1.30 (1.24-1.35)        | 1.20 (1.15-1.26)       | 909 (666)                                        | 1.36 (1.28-1.46)        | 1.23 (1.16-1.31)       |
| Deaths within 5 years  | Never smokers          | 6579 (103)                                         | 1.35 (1.17-1.56)        | 1.35 (1.16-1.57)       | 1429 (217)                                       | 1.37 (1.23-1.54)        | 1.38 (1.24-1.54)       |
|                        | Former smokers         | 9403 (288)                                         | 1.43 (1.32-1.55)        | 1.49 (1.37-1.63)       | 3083 (590)                                       | 1.33 (1.25-1.41)        | 1.28 (1.20-1.36)       |
|                        | Current smokers        | 6640 (332)                                         | 1.31 (1.21-1.43)        | 1.24 (1.15-1.35)       | 909 (250)                                        | 1.33 (1.20-1.48)        | 1.19 (1.08-1.32)       |
| Deaths after 5 years   | Never smokers          | 6476 (397)                                         | 1.12 (1.03-1.21)        | 1.14 (1.05-1.24)       | 1212 (566)                                       | 1.19 (1.11-1.28)        | 1.15 (1.07-1.24)       |
|                        | Former smokers         | 9115 (924)                                         | 1.29 (1.23-1.36)        | 1.25 (1.19-1.32)       | 2493 (1293)                                      | 1.19 (1.14-1.24)        | 1.17 (1.12-1.22)       |
|                        | Current smokers        | 6308 (939)                                         | 1.29 (1.23-1.36)        | 1.18 (1.12-1.25)       | 659 (416)                                        | 1.38 (1.27-1.50)        | 1.25 (1.15-1.36)       |

Spirometric indices (FEV1, FVC and FEV1/FVC ratio) are modelled as z-scores derived from the Global Lung Initiative 2012 reference equations for whites. All hazard ratios are expressed per unit decrement in z-score, adjusted for age, sex, height, socio-economic status, geographical region and survey year.

**e-Table 3 Relationship of spirometric indices to all-cause mortality before and after 5 years, among males and females, and among younger and older subjects, by smoking habit, in UK Biobank**

*Biobank age 40-69, white ethnicity, all usable spirograms*

| <i>Subjects and timing of death</i>  | <i>Smoking history</i> | <i>Total N (deaths)</i> | <i>zFEV1 HR (95%CI)</i> | <i>zFVC HR (95%CI)</i> |
|--------------------------------------|------------------------|-------------------------|-------------------------|------------------------|
| All subjects, deaths within 5 years  | Never smokers          | 149343 (1599)           | 1.23 (1.17-1.28)        | 1.26 (1.20-1.32)       |
|                                      | Former smokers         | 191627 (2998)           | 1.40 (1.36-1.45)        | 1.40 (1.35-1.45)       |
|                                      | Current smokers        | 38514 (1112)            | 1.39 (1.32-1.46)        | 1.29 (1.22-1.36)       |
| All subjects, deaths after 5 years   | Never smokers          | 147744 (802)            | 1.18 (1.11-1.26)        | 1.21 (1.13-1.29)       |
|                                      | Former smokers         | 188629 (1430)           | 1.33 (1.27-1.39)        | 1.32 (1.25-1.38)       |
|                                      | Current smokers        | 37402 (564)             | 1.37 (1.28-1.47)        | 1.30 (1.20-1.40)       |
| Males, all deaths                    | Never smokers          | 56924 (1143)            | 1.24 (1.18-1.31)        | 1.28 (1.21-1.35)       |
|                                      | Former smokers         | 89542 (2714)            | 1.39 (1.34-1.43)        | 1.39 (1.34-1.44)       |
|                                      | Current smokers        | 19909 (1096)            | 1.36 (1.30-1.43)        | 1.27 (1.21-1.34)       |
| Females, all deaths                  | Never smokers          | 92419 (1258)            | 1.18 (1.12-1.24)        | 1.20 (1.14-1.27)       |
|                                      | Former smokers         | 102085 (1714)           | 1.37 (1.31-1.43)        | 1.34 (1.28-1.40)       |
|                                      | Current smokers        | 18605 (580)             | 1.42 (1.33-1.52)        | 1.33 (1.23-1.43)       |
| Age 40-59 at entry, all deaths       | Never smokers          | 90676 (872)             | 1.23 (1.16-1.31)        | 1.25 (1.17-1.33)       |
|                                      | Former smokers         | 101171 (1161)           | 1.36 (1.29-1.43)        | 1.37 (1.30-1.45)       |
|                                      | Current smokers        | 25584 (692)             | 1.39 (1.31-1.48)        | 1.27 (1.19-1.36)       |
| Age 60-69 at entry, all deaths       | Never smokers          | 58667 (1529)            | 1.20 (1.15-1.26)        | 1.23 (1.18-1.29)       |
|                                      | Former smokers         | 90456 (3267)            | 1.39 (1.35-1.43)        | 1.37 (1.33-1.42)       |
|                                      | Current smokers        | 12930 (984)             | 1.38 (1.31-1.45)        | 1.31 (1.24-1.39)       |
| BMI<30kg/m <sup>2</sup> , all deaths | Never smokers          | 113932 (1628)           | 1.17 (1.11-1.22)        | 1.19 (1.14-1.25)       |
|                                      | Former smokers         | 142418 (2893)           | 1.35 (1.30-1.39)        | 1.32 (1.27-1.37)       |
|                                      | Current smokers        | 29638 (1266)            | 1.37 (1.30-1.43)        | 1.27 (1.21-1.33)       |
| BMI≥30kg/m <sup>2</sup> , all deaths | Never smokers          | 33367 (696)             | 1.19 (1.11-1.27)        | 1.18 (1.10-1.27)       |
|                                      | Former smokers         | 46624 (1403)            | 1.36 (1.30-1.43)        | 1.37 (1.30-1.44)       |
|                                      | Current smokers        | 8326 (365)              | 1.49 (1.36-1.63)        | 1.44 (1.31-1.59)       |

Spirometric indices (FEV1 and FVC) are modelled as z-scores derived from the Global Lung Initiative 2012 reference equations for whites. All hazard ratios are expressed per unit decrement in z-score, adjusted for age, sex, height, socio-economic status and geographical region (recruitment centre).

e-Table 4

**Comparison of best quality spiromgrams with all usable spiromgrams to predict all-cause and cause-specific mortality, by smoking habit, in UK Biobank**

| <i>Cause of death</i>          | <i>Smoking history</i> | <i>Biobank age 40-69, white ethnicity, best spiromgrams</i> |                         |                        | <i>Biobank age 40-69, white ethnicity, usable spiromgrams</i> |                         |                        |
|--------------------------------|------------------------|-------------------------------------------------------------|-------------------------|------------------------|---------------------------------------------------------------|-------------------------|------------------------|
|                                |                        | <i>Total N (deaths)</i>                                     | <i>zFEV1 HR (95%CI)</i> | <i>zFVC HR (95%CI)</i> | <i>Total N (deaths)</i>                                       | <i>zFEV1 HR (95%CI)</i> | <i>zFVC HR (95%CI)</i> |
| All causes                     | Never smokers          | 102945 (1583)                                               | 1.23 (1.18-1.29)        | 1.29 (1.23-1.35)       | 149343 (2401)                                                 | 1.21 (1.17-1.26)        | 1.24 (1.19-1.29)       |
|                                | Former smokers         | 134173 (3043)                                               | 1.39 (1.35-1.44)        | 1.40 (1.35-1.45)       | 191627 (4428)                                                 | 1.38 (1.35-1.42)        | 1.37 (1.33-1.41)       |
|                                | Current smokers        | 26105 (1079)                                                | 1.39 (1.32-1.46)        | 1.30 (1.23-1.38)       | 38514 (1676)                                                  | 1.38 (1.33-1.44)        | 1.29 (1.24-1.35)       |
| Respiratory diseases           | Never smokers          | 102945 (48)                                                 | 2.07 (1.63-2.62)        | 2.22 (1.76-2.80)       | 149343 (69)                                                   | 1.86 (1.53-2.27)        | 2.15 (1.77-2.61)       |
|                                | Former smokers         | 134173 (140)                                                | 2.52 (2.20-2.88)        | 2.28 (1.98-2.63)       | 191627 (197)                                                  | 2.46 (2.20-2.76)        | 2.26 (2.01-2.54)       |
|                                | Current smokers        | 26105 (66)                                                  | 2.93 (2.37-3.62)        | 2.44 (1.99-3.00)       | 38514 (106)                                                   | 2.52 (2.15-2.96)        | 2.08 (1.76-2.45)       |
| Circulatory diseases           | Never smokers          | 102945 (269)                                                | 1.46 (1.31-1.62)        | 1.57 (1.41-1.76)       | 149343 (431)                                                  | 1.41 (1.30-1.53)        | 1.47 (1.35-1.60)       |
|                                | Former smokers         | 134173 (590)                                                | 1.56 (1.46-1.68)        | 1.66 (1.54-1.79)       | 191627 (860)                                                  | 1.58 (1.49-1.67)        | 1.64 (1.54-1.74)       |
|                                | Current smokers        | 26105 (219)                                                 | 1.43 (1.28-1.60)        | 1.45 (1.28-1.63)       | 38514 (366)                                                   | 1.41 (1.30-1.54)        | 1.38 (1.26-1.52)       |
| Cancer                         | Never smokers          | 102945 (1023)                                               | 1.10 (1.04-1.16)        | 1.13 (1.07-1.20)       | 149343 (1535)                                                 | 1.08 (1.03-1.13)        | 1.10 (1.05-1.15)       |
|                                | Former smokers         | 134173 (1907)                                               | 1.27 (1.22-1.32)        | 1.25 (1.20-1.31)       | 191627 (2762)                                                 | 1.25 (1.21-1.30)        | 1.23 (1.18-1.27)       |
|                                | Current smokers        | 26105 (624)                                                 | 1.27 (1.19-1.36)        | 1.18 (1.09-1.27)       | 38514 (937)                                                   | 1.28 (1.22-1.36)        | 1.20 (1.13-1.27)       |
| Other non-respiratory diseases | Never smokers          | 102945 (243)                                                | 1.44 (1.29-1.61)        | 1.51 (1.35-1.69)       | 149343 (366)                                                  | 1.46 (1.33-1.59)        | 1.45 (1.32-1.59)       |
|                                | Former smokers         | 134173 (406)                                                | 1.43 (1.31-1.56)        | 1.49 (1.36-1.63)       | 191627 (609)                                                  | 1.41 (1.32-1.51)        | 1.43 (1.33-1.55)       |
|                                | Current smokers        | 26105 (170)                                                 | 1.36 (1.20-1.55)        | 1.25 (1.08-1.44)       | 38514 (267)                                                   | 1.36 (1.23-1.51)        | 1.25 (1.12-1.39)       |

Spirometric indices (FEV1 and FVC) are modelled as z-scores derived from the Global Lung Initiative 2012 reference equations for whites.

All hazard ratios are expressed per unit decrement in z-score, adjusted for age, sex, height, socio-economic status and geographical region (recruitment centre).

e-Table 5

**Relationship of spirometric indices to all-cause and cause-specific mortality among younger and older subjects, by smoking habit, in the Health Surveys for England and Scottish Health Surveys**

| <i>Cause of death</i>          | <i>Smoking history</i> | <i>HSE-SHS age 40-69 at entry, white ethnicity</i> |                         |                        | <i>HSE-SHS age 70+ at entry, white ethnicity</i> |                         |                        |
|--------------------------------|------------------------|----------------------------------------------------|-------------------------|------------------------|--------------------------------------------------|-------------------------|------------------------|
|                                |                        | <i>Total N (deaths)</i>                            | <i>zFEV1 HR (95%CI)</i> | <i>zFVC HR (95%CI)</i> | <i>Total N (deaths)</i>                          | <i>zFEV1 HR (95%CI)</i> | <i>zFVC HR (95%CI)</i> |
| All causes                     | Never smokers          | 6579 (500)                                         | 1.17 (1.09-1.25)        | 1.19 (1.10-1.28)       | 1429 (783)                                       | 1.24 (1.17-1.32)        | 1.22 (1.15-1.29)       |
|                                | Former smokers         | 9403 (1212)                                        | 1.33 (1.28-1.39)        | 1.31 (1.25-1.37)       | 3083 (1883)                                      | 1.23 (1.19-1.28)        | 1.20 (1.16-1.25)       |
|                                | Current smokers        | 6640 (1271)                                        | 1.30 (1.24-1.35)        | 1.20 (1.15-1.26)       | 909 (666)                                        | 1.36 (1.28-1.46)        | 1.23 (1.16-1.31)       |
| Respiratory diseases           | Never smokers          | 6579 (24)                                          | 1.72 (1.34-2.21)        | 1.61 (1.25-2.08)       | 1429 (110)                                       | 1.88 (1.58-2.24)        | 1.72 (1.45-2.03)       |
|                                | Former smokers         | 9403 (109)                                         | 2.39 (2.08-2.76)        | 1.93 (1.67-2.24)       | 3083 (255)                                       | 1.72 (1.56-1.90)        | 1.56 (1.41-1.72)       |
|                                | Current smokers        | 6640 (149)                                         | 2.29 (2.01-2.61)        | 1.77 (1.55-2.02)       | 909 (140)                                        | 2.27 (1.94-2.66)        | 1.68 (1.46-1.93)       |
| Circulatory diseases           | Never smokers          | 6579 (130)                                         | 1.21 (1.06-1.38)        | 1.22 (1.06-1.40)       | 1429 (299)                                       | 1.26 (1.13-1.39)        | 1.28 (1.16-1.41)       |
|                                | Former smokers         | 9403 (390)                                         | 1.37 (1.28-1.48)        | 1.39 (1.28-1.50)       | 3083 (745)                                       | 1.20 (1.13-1.27)        | 1.22 (1.15-1.29)       |
|                                | Current smokers        | 6640 (380)                                         | 1.26 (1.17-1.36)        | 1.22 (1.12-1.32)       | 909 (212)                                        | 1.21 (1.08-1.35)        | 1.20 (1.07-1.34)       |
| Cancer                         | Never smokers          | 6579 (241)                                         | 1.10 (1.00-1.22)        | 1.12 (1.01-1.24)       | 1429 (166)                                       | 1.08 (0.95-1.23)        | 1.09 (0.96-1.24)       |
|                                | Former smokers         | 9403 (509)                                         | 1.18 (1.10-1.26)        | 1.14 (1.06-1.22)       | 3083 (448)                                       | 1.19 (1.10-1.28)        | 1.14 (1.05-1.22)       |
|                                | Current smokers        | 6640 (532)                                         | 1.21 (1.13-1.29)        | 1.09 (1.02-1.17)       | 909 (197)                                        | 1.20 (1.07-1.34)        | 1.08 (0.96-1.21)       |
| Other non-respiratory diseases | Never smokers          | 6579 (105)                                         | 1.15 (0.98-1.34)        | 1.20 (1.03-1.41)       | 1429 (208)                                       | 1.11 (0.98-1.25)        | 1.04 (0.92-1.17)       |
|                                | Former smokers         | 9403 (204)                                         | 1.22 (1.10-1.35)        | 1.32 (1.18-1.48)       | 3083 (435)                                       | 1.11 (1.03-1.20)        | 1.08 (1.00-1.17)       |
|                                | Current smokers        | 6640 (210)                                         | 1.11 (1.00-1.24)        | 1.15 (1.03-1.28)       | 909 (117)                                        | 1.20 (1.03-1.40)        | 1.11 (0.95-1.29)       |

Spirometric indices (FEV1 and FVC) are modelled as z-scores derived from the Global Lung Initiative 2012 reference equations for whites.

All hazard ratios are expressed per unit decrement in z-score, adjusted for age, sex, height, socio-economic status, geographical region and survey year.

**e-Table 6 Spirometric prediction of mortality among subjects with and without a history of selected diseases at entry, by smoking habit, in UK Biobank**

| <i>Condition and cause of death</i>             | <i>Smoking history</i> | <i>Biobank age 40-69, white, no history of condition</i> |                         |                        | <i>Biobank age 40-69, white, with history of condition</i> |                         |                        |
|-------------------------------------------------|------------------------|----------------------------------------------------------|-------------------------|------------------------|------------------------------------------------------------|-------------------------|------------------------|
|                                                 |                        | <i>Total N (deaths)</i>                                  | <i>zFEV1 HR (95%CI)</i> | <i>zFVC HR (95%CI)</i> | <i>Total N (deaths)</i>                                    | <i>zFEV1 HR (95%CI)</i> | <i>zFVC HR (95%CI)</i> |
| Respiratory disease at entry, all deaths        | Never smokers          | 130798 (2081)                                            | 1.21 (1.16-1.26)        | 1.22 (1.17-1.27)       | 18545 (320)                                                | 1.23 (1.12-1.35)        | 1.33 (1.21-1.47)       |
|                                                 | Former smokers         | 166259 (3711)                                            | 1.36 (1.32-1.40)        | 1.34 (1.30-1.38)       | 25368 (717)                                                | 1.48 (1.39-1.57)        | 1.48 (1.39-1.58)       |
|                                                 | Current smokers        | 33491 (1352)                                             | 1.32 (1.26-1.38)        | 1.21 (1.15-1.27)       | 5023 (324)                                                 | 1.53 (1.39-1.68)        | 1.48 (1.35-1.63)       |
| Circulatory disease at entry, circulatory death | Never smokers          | 109141 (189)                                             | 1.40 (1.23-1.59)        | 1.40 (1.23-1.60)       | 40202 (242)                                                | 1.35 (1.20-1.51)        | 1.43 (1.27-1.60)       |
|                                                 | Former smokers         | 131593 (281)                                             | 1.39 (1.26-1.54)        | 1.40 (1.26-1.57)       | 60034 (579)                                                | 1.59 (1.48-1.70)        | 1.64 (1.52-1.77)       |
|                                                 | Current smokers        | 27843 (162)                                              | 1.32 (1.16-1.50)        | 1.29 (1.12-1.48)       | 10671 (204)                                                | 1.42 (1.26-1.59)        | 1.36 (1.20-1.54)       |
| Cancer at entry, cancer death                   | Never smokers          | 137742 (978)                                             | 1.05 (0.99-1.11)        | 1.06 (1.00-1.12)       | 11601 (557)                                                | 1.10 (1.02-1.18)        | 1.13 (1.04-1.22)       |
|                                                 | Former smokers         | 174917 (1898)                                            | 1.21 (1.16-1.26)        | 1.18 (1.13-1.23)       | 16710 (864)                                                | 1.32 (1.25-1.40)        | 1.30 (1.22-1.38)       |
|                                                 | Current smokers        | 35573 (738)                                              | 1.29 (1.22-1.37)        | 1.18 (1.10-1.26)       | 2941 (199)                                                 | 1.24 (1.11-1.39)        | 1.28 (1.12-1.45)       |

Spirometric indices (FEV1 and FVC) are modelled as z-scores derived from the Global Lung Initiative 2012 reference equations for whites.

All hazard ratios are expressed per unit decrement in z-score, adjusted for age, sex, height, area-based socio-economic measure and geographical region (recruitment centre)..

**e-Table 7 Mortality from all causes, and from circulatory diseases, by quartile of systolic blood pressure, body mass index and spirometric indices among white lifelong non-smokers aged 40-69 at entry in national health surveys (HSE and SHS) and in UK Biobank**

| <i>Risk factor</i> | <i>Quartile</i> | <i>All-cause mortality</i>                                |             |                                                            |             | <i>Circulatory mortality</i>                              |             |                                                           |             |
|--------------------|-----------------|-----------------------------------------------------------|-------------|------------------------------------------------------------|-------------|-----------------------------------------------------------|-------------|-----------------------------------------------------------|-------------|
|                    |                 | <i>HSE-SHS HR (95%CI)</i><br><i>(based on 495 deaths)</i> |             | <i>Biobank HR (95%CI)</i><br><i>(based on 2319 deaths)</i> |             | <i>HSE-SHS HR (95%CI)</i><br><i>(based on 129 deaths)</i> |             | <i>Biobank HR (95%CI)</i><br><i>(based on 403 deaths)</i> |             |
| SBP                | Q1 (low)        | 1.00                                                      | (reference) | 1.00                                                       | (reference) | 1.00                                                      | (reference) | 1.00                                                      | (reference) |
|                    | Q2              | 0.80                                                      | (0.59-1.09) | 0.93                                                       | (0.82-1.05) | 1.20                                                      | (0.59-2.42) | 0.81                                                      | (0.58-1.14) |
|                    | Q3              | 0.78                                                      | (0.58-1.06) | 0.89                                                       | (0.78-1.01) | 0.72                                                      | (0.34-1.50) | 0.97                                                      | (0.71-1.34) |
|                    | Q4 (high)       | 1.12                                                      | (0.85-1.48) | 0.99                                                       | (0.88-1.12) | 1.98                                                      | (1.05-3.72) | 1.12                                                      | (0.82-1.51) |
| BMI                | Q1 (low)        | 1.00                                                      | (reference) | 1.00                                                       | (reference) | 1.00                                                      | (reference) | 1.00                                                      | (reference) |
|                    | Q2              | 0.99                                                      | (0.75-1.30) | 0.90                                                       | (0.79-1.01) | 1.05                                                      | (0.59-1.87) | 1.08                                                      | (0.77-1.51) |
|                    | Q3              | 1.05                                                      | (0.80-1.37) | 0.95                                                       | (0.84-1.08) | 1.39                                                      | (0.80-2.42) | 1.35                                                      | (0.97-1.86) |
|                    | Q4 (high)       | 1.30                                                      | (1.00-1.68) | 1.36                                                       | (1.21-1.53) | 1.90                                                      | (1.13-3.22) | 2.05                                                      | (1.51-2.79) |
| zFEV1              | Q4 (high)       | 1.00                                                      | (reference) | 1.00                                                       | (reference) | 1.00                                                      | (reference) | 1.00                                                      | (reference) |
|                    | Q3              | 0.95                                                      | (0.71-1.27) | 1.12                                                       | (0.99-1.26) | 1.73                                                      | (0.93-3.22) | 0.97                                                      | (0.71-1.33) |
|                    | Q2              | 1.20                                                      | (0.91-1.58) | 1.15                                                       | (1.01-1.30) | 2.13                                                      | (1.16-3.89) | 1.29                                                      | (0.96-1.73) |
|                    | Q1 (low)        | 1.56                                                      | (1.20-2.01) | 1.60                                                       | (1.43-1.79) | 2.24                                                      | (1.25-4.04) | 1.99                                                      | (1.52-2.61) |
| zFVC               | Q4 (high)       | 1.00                                                      | (reference) | 1.00                                                       | (reference) | 1.00                                                      | (reference) | 1.00                                                      | (reference) |
|                    | Q3              | 1.01                                                      | (0.76-1.34) | 1.05                                                       | (0.93-1.19) | 1.38                                                      | (0.77-2.46) | 1.16                                                      | (0.85-1.60) |
|                    | Q2              | 1.20                                                      | (0.92-1.58) | 1.25                                                       | (1.11-1.41) | 1.74                                                      | (0.99-3.04) | 1.62                                                      | (1.20-2.18) |
|                    | Q1 (low)        | 1.66                                                      | (1.29-2.14) | 1.62                                                       | (1.44-1.82) | 1.98                                                      | (1.15-3.40) | 2.19                                                      | (1.65-2.92) |

Spirometric indices (FEV1 and FVC) are modelled as z-scores derived from the Global Lung Initiative 2012 reference equations for whites. All hazard ratios are adjusted for age, sex, height, socio-economic status, geographical region and survey year.
